# Supplementary material for: Aqueous syntheses of anthracene-based mixed-ligand coordination polymers and their structural and optical properties
Source: Royal Society of Chemistry journal article supplement (doi:10.1039/d4ce00399c), 2024-01-01
Supplement: d4ce00399c1.pdf [file d4ce00399c1.pdf]

## Supplementary information

# Aqueous syntheses of anthracene-based mixed-ligand coordination polymers and their structural and optical properties

*Antti Marttinen, Manu Lahtinen\**

Department of Chemistry, University of Jyväskylä, Jyväskylä, Finland.

### Contents

|                                                                                                                  |    |
|------------------------------------------------------------------------------------------------------------------|----|
| NMR measurements.....                                                                                            | 2  |
| Characterization of Na <sub>2</sub> aip·H <sub>2</sub> O and Na <sub>2</sub> ata·H <sub>2</sub> O.....           | 3  |
| Characterization of the new nitrate salt of dia ligand (diaH <sub>2</sub> (NO <sub>3</sub> ) <sub>2</sub> )..... | 4  |
| Crystallographic data of the MOF/CP single crystals.....                                                         | 8  |
| PXRD patterns and FT-IR spectra of the synthesized bulk products.....                                            | 21 |
| Tauc-plots and optical band gap estimates of the synthesized compounds .....                                     | 29 |

## NMR measurements

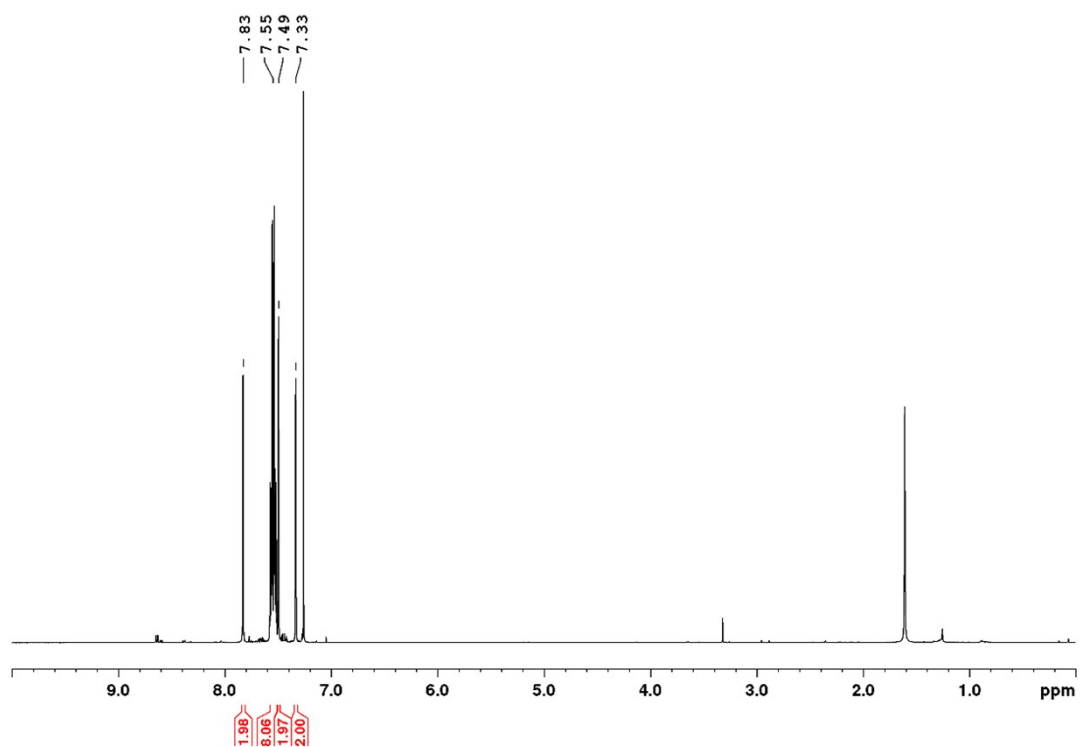

Figure S1.  $^1\text{H}$  NMR spectrum of dia ligand in  $\text{CDCl}_3$  (residual  $\text{CHCl}_3$  peak at 7.26 ppm, impurity  $\text{H}_2\text{O}$  peak at 1.61 ppm)

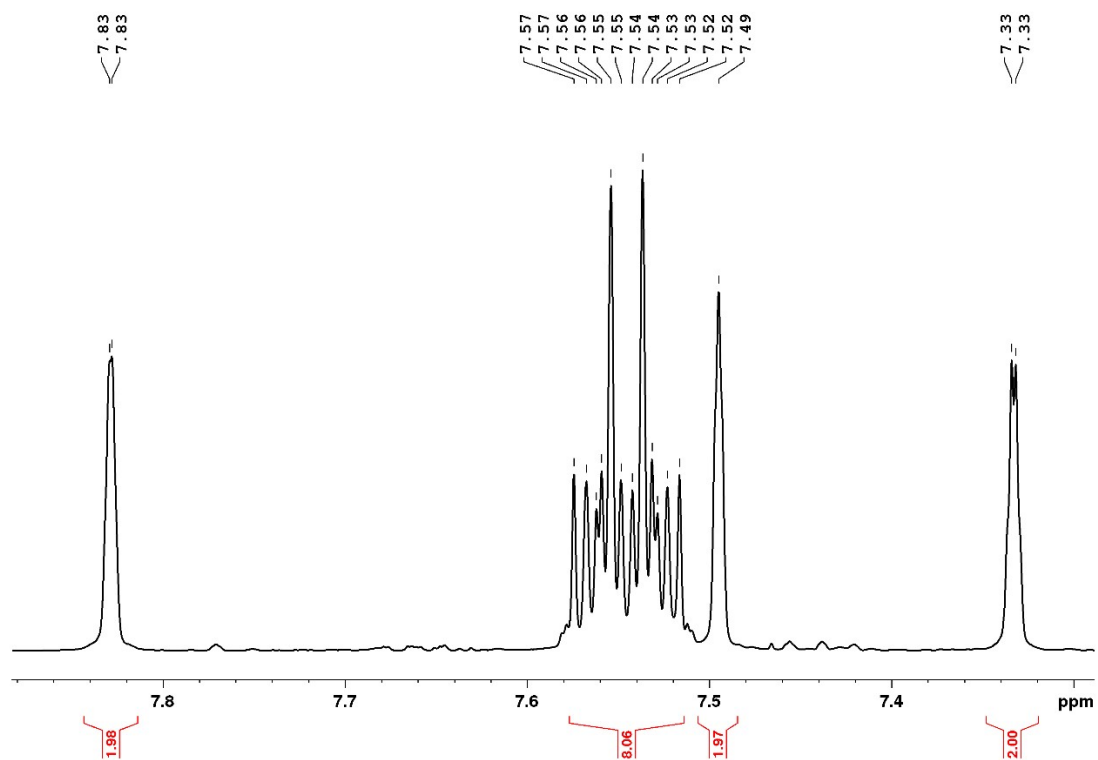

Figure S2. Zoomed aromatic region of  $^1\text{H}$  NMR spectrum of dia ligand.

## Characterization of $\text{Na}_2\text{aip}\cdot\text{H}_2\text{O}$ and $\text{Na}_2\text{ata}\cdot\text{H}_2\text{O}$

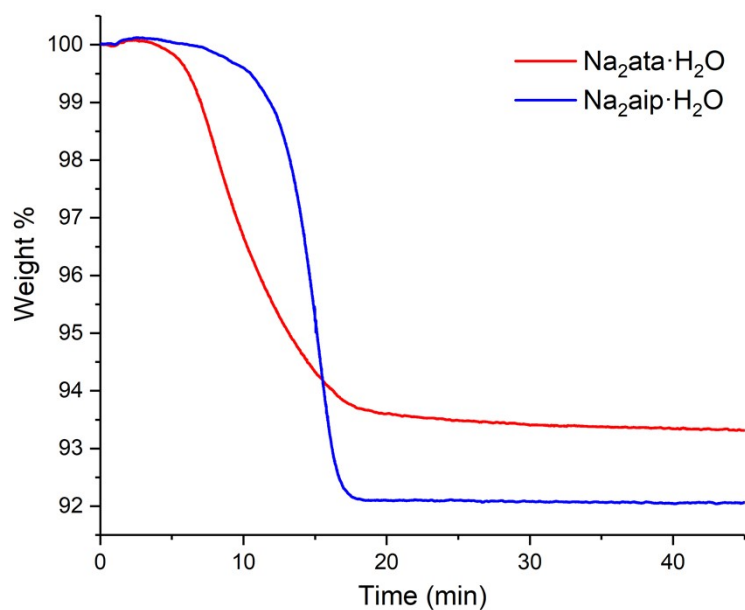

Figure S3. TGA curves of the synthesized  $\text{Na}_2\text{aip}\cdot\text{H}_2\text{O}$  and  $\text{Na}_2\text{ata}\cdot\text{H}_2\text{O}$  showing the evaporation of crystal water. Heated and held at 175 °C for 30 minutes.

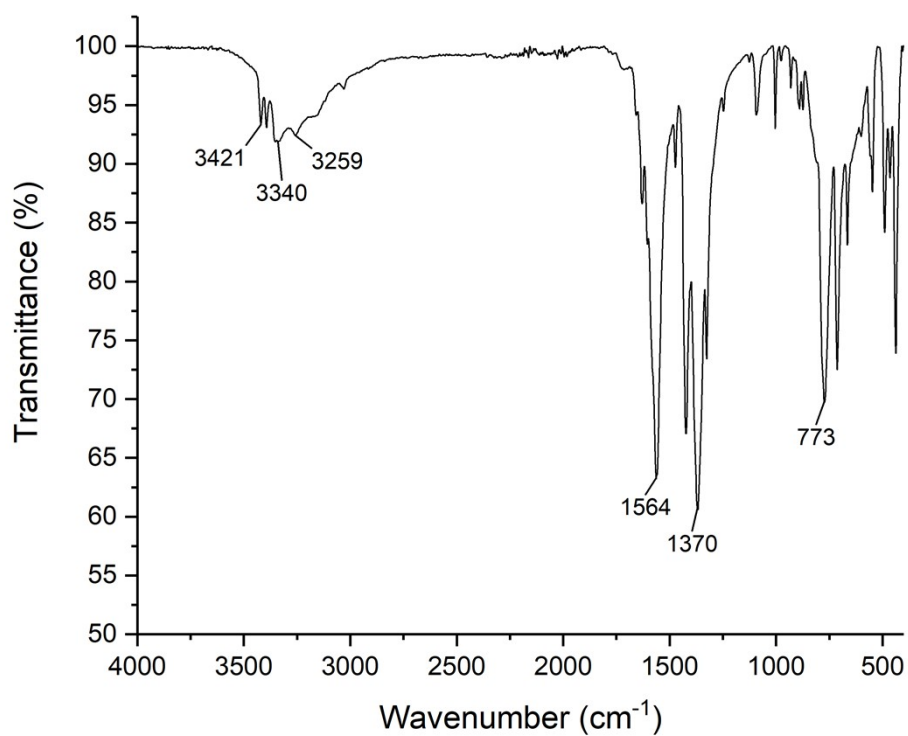

Figure S4. FT-IR spectra of  $\text{Na}_2\text{aip}\cdot\text{H}_2\text{O}$ .

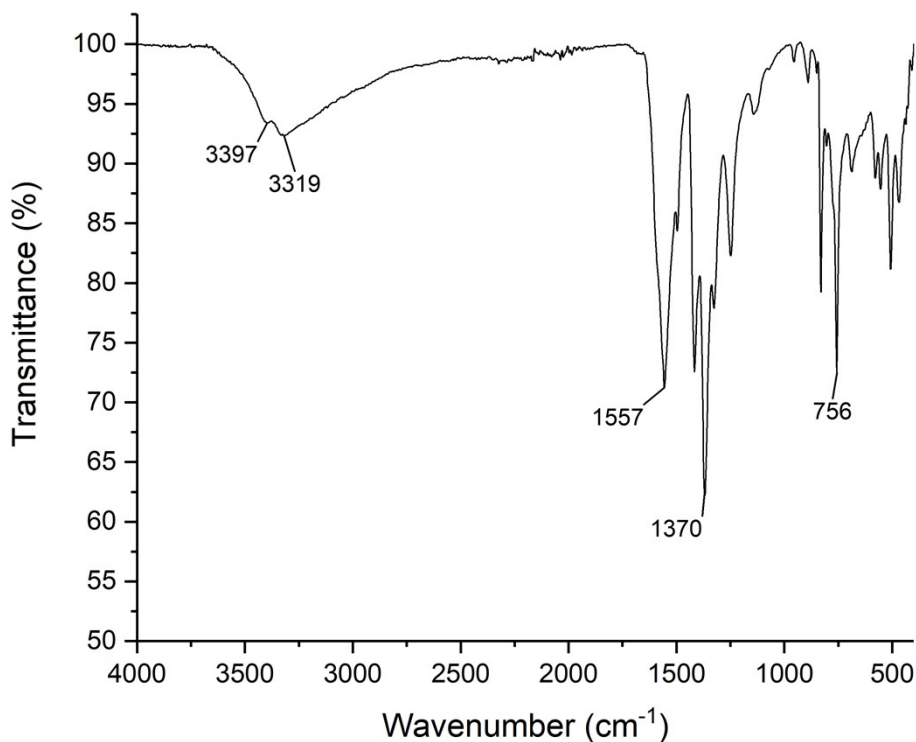

Figure S5. FT-IR spectra of Na<sub>2</sub>ata·H<sub>2</sub>O.

### Characterization of the new nitrate salt of dia ligand (diaH<sub>2</sub>(NO<sub>3</sub>)<sub>2</sub>)

Single crystals of the nitrate salt of dia ligand were obtained by dissolving the powderous salt in hot methanol and leaving the solution to saturate in a closed glass vial. The salt crystallizes in the monoclinic space group of  $P2_1/n$ , showing one nitrate anion and half of dia ligand with a protonated imidazole moiety in the asymmetric unit. The imidazole hydrogen is strongly bonded to the nitrate oxygen with a bond length of 1.818(1) Å (Fig. S6A). Dia molecules pack in the crystal lattice so that they alternate between a horizontal and a vertical orientation at a roughly 90-degree angle relative to each other. This creates an angular zigzag structure (Fig. S6B). The nitrate anions occupy the empty spaces in the structure next to the anthracene rings of the neighboring ligands (Fig. S6C).

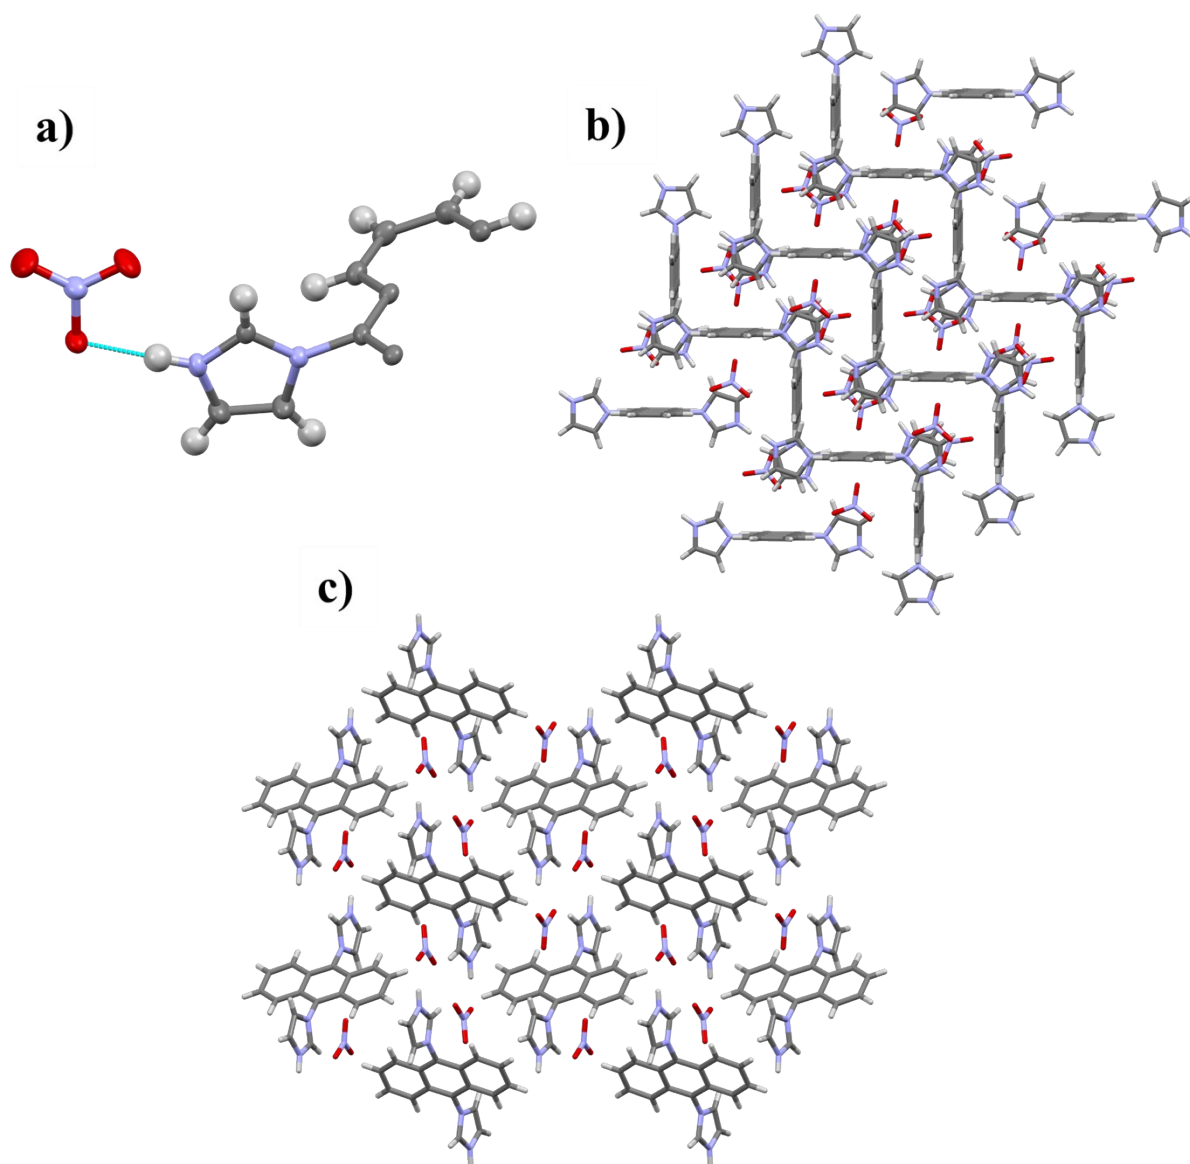

Figure S6. Asymmetric unit of diaH<sub>2</sub>(NO<sub>3</sub>)<sub>2</sub>, hydrogen bonding represented as a blue line. Thermal ellipsoids of atoms are presented at 50 % probability level. b) zigzag packing of dia molecules, and c) crystal structure of diaH<sub>2</sub>(NO<sub>3</sub>)<sub>2</sub> viewed along the *a*-axis.

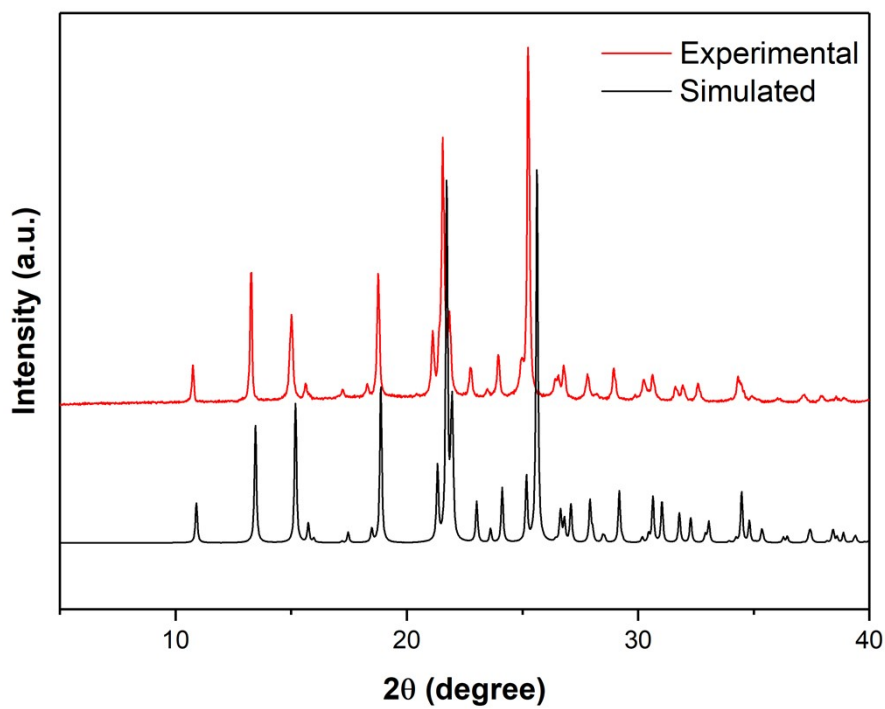

Figure S7. PXRD pattern comparison of the synthesized  $\text{diaH}_2(\text{NO}_3)_2$  bulk powder and the simulated pattern from the SCXRD data.

Table S1: Crystallographic data of diaH<sub>2</sub>(NO<sub>3</sub>)<sub>2</sub> salt.

|                                                              |                                                                              |
|--------------------------------------------------------------|------------------------------------------------------------------------------|
| CCDC deposition number                                       | 2309443                                                                      |
| Empirical formula                                            | C <sub>20</sub> H <sub>16</sub> N <sub>6</sub> O <sub>6</sub>                |
| Formula weight                                               | 436.39                                                                       |
| Temperature/K                                                | 120.01(10)                                                                   |
| Crystal system                                               | monoclinic                                                                   |
| Space group                                                  | <i>P</i> 2 <sub>1</sub> / <i>n</i>                                           |
| <i>a</i> /Å                                                  | 7.17230(10)                                                                  |
| <i>b</i> /Å                                                  | 10.30090(10)                                                                 |
| <i>c</i> /Å                                                  | 13.34380(10)                                                                 |
| $\alpha$ /°                                                  | 90                                                                           |
| $\beta$ /°                                                   | 99.6960(10)                                                                  |
| $\gamma$ /°                                                  | 90                                                                           |
| Volume/Å <sup>3</sup>                                        | 971.773(18)                                                                  |
| <i>Z</i>                                                     | 2                                                                            |
| $\rho_{\text{calc}}/\text{cm}^3$                             | 1.491                                                                        |
| $\mu/\text{mm}^{-1}$                                         | 0.961                                                                        |
| F(000)                                                       | 452.0                                                                        |
| Crystal size/mm <sup>3</sup>                                 | 0.141 × 0.118 × 0.098                                                        |
| 2 $\theta$ range for data collection/°                       | 10.91 to 158.142                                                             |
| Reflections collected                                        | 10532                                                                        |
| Independent reflections                                      | 2060 [ <i>R</i> <sub>int</sub> = 0.0232, <i>R</i> <sub>sigma</sub> = 0.0183] |
| Data/restraints/parameters                                   | 2060/0/145                                                                   |
| Goodness-of-fit on F <sup>2</sup>                            | 1.098                                                                        |
| Final <i>R</i> indexes [ <i>I</i> ≥ 2 $\sigma$ ( <i>I</i> )] | <i>R</i> <sub>1</sub> = 0.0377, <i>wR</i> <sub>2</sub> = 0.1011              |
| Final <i>R</i> indexes [all data]                            | <i>R</i> <sub>1</sub> = 0.0406, <i>wR</i> <sub>2</sub> = 0.1034              |
| Largest diff. peak/hole / e Å <sup>-3</sup>                  | 0.19/-0.29                                                                   |

## Crystallographic data of the MOF/CP single crystals

Table S2: Crystallographic data of the crystallized compounds **1-6** and **6B** (-153 °C and 0 °C)

| Structure                                   | 1                                                                               | 2                                                                               | 3                                                                               |
|---------------------------------------------|---------------------------------------------------------------------------------|---------------------------------------------------------------------------------|---------------------------------------------------------------------------------|
| CCDC deposition number                      | 2309435                                                                         | 2309436                                                                         | 2309437                                                                         |
| Empirical formula                           | C <sub>56</sub> H <sub>50</sub> Cu <sub>2</sub> N <sub>10</sub> O <sub>14</sub> | C <sub>56</sub> H <sub>48</sub> N <sub>10</sub> Ni <sub>2</sub> O <sub>13</sub> | C <sub>56</sub> H <sub>44</sub> Cu <sub>2</sub> N <sub>10</sub> O <sub>12</sub> |
| Formula weight                              | 1214.14                                                                         | 1186.46                                                                         | 1176.09                                                                         |
| Temperature/K                               | 120.00(10)                                                                      | 120.01(10)                                                                      | 120.01(10)                                                                      |
| Crystal system                              | monoclinic                                                                      | monoclinic                                                                      | triclinic                                                                       |
| Space group                                 | <i>P2<sub>1</sub>/n</i>                                                         | <i>P2<sub>1</sub>/n</i>                                                         | <i>P-1</i>                                                                      |
| a/Å                                         | 10.15270(10)                                                                    | 10.1841(2)                                                                      | 10.8808(3)                                                                      |
| b/Å                                         | 21.4379(3)                                                                      | 22.1378(4)                                                                      | 11.1603(3)                                                                      |
| c/Å                                         | 12.6218(2)                                                                      | 12.2623(2)                                                                      | 12.5136(3)                                                                      |
| α/°                                         | 90                                                                              | 90                                                                              | 111.044(2)                                                                      |
| β/°                                         | 96.0470(10)                                                                     | 96.771(2)                                                                       | 107.145(2)                                                                      |
| γ/°                                         | 90                                                                              | 90                                                                              | 95.432(2)                                                                       |
| Volume/Å <sup>3</sup>                       | 2731.88(6)                                                                      | 2745.30(9)                                                                      | 1320.49(6)                                                                      |
| Z                                           | 2                                                                               | 2                                                                               | 1                                                                               |
| ρ <sub>calc</sub> /cm <sup>3</sup>          | 1.476                                                                           | 1.435                                                                           | 1.479                                                                           |
| μ/mm <sup>-1</sup>                          | 1.610                                                                           | 1.477                                                                           | 1.619                                                                           |
| F(000)                                      | 1252.0                                                                          | 1228.0                                                                          | 604.0                                                                           |
| Crystal size/mm <sup>3</sup>                | 0.221 × 0.042 × 0.035                                                           | 0.12 × 0.021 × 0.01                                                             | 0.092 × 0.077 × 0.052                                                           |
| 2θ range for data collection/°              | 8.162 to 154.836                                                                | 7.988 to 153.11                                                                 | 8.094 to 159.038                                                                |
| Reflections collected                       | 16926                                                                           | 30247                                                                           | 21942                                                                           |
| Independent reflections                     | 5631 [R <sub>int</sub> = 0.0317,<br>R <sub>sigma</sub> = 0.0319]                | 5747 [R <sub>int</sub> = 0.0848,<br>R <sub>sigma</sub> = 0.0517]                | 5597 [R <sub>int</sub> = 0.0352,<br>R <sub>sigma</sub> = 0.0314]                |
| Data/restraints/parameters                  | 5631/0/385                                                                      | 5747/8/399                                                                      | 5597/1/389                                                                      |
| Goodness-of-fit on F <sup>2</sup>           | 1.042                                                                           | 1.082                                                                           | 1.078                                                                           |
| Final R indexes [I >= 2σ (I)]               | R <sub>1</sub> = 0.0396,<br>wR <sub>2</sub> = 0.1010                            | R <sub>1</sub> = 0.0572,<br>wR <sub>2</sub> = 0.1235                            | R <sub>1</sub> = 0.0476,<br>wR <sub>2</sub> = 0.1154                            |
| Final R indexes [all data]                  | R <sub>1</sub> = 0.0458,<br>wR <sub>2</sub> = 0.1059                            | R <sub>1</sub> = 0.0891,<br>wR <sub>2</sub> = 0.1377                            | R <sub>1</sub> = 0.0560,<br>wR <sub>2</sub> = 0.1198                            |
| Largest diff. peak/hole / e Å <sup>-3</sup> | 0.75/-0.56                                                                      | 0.51/-0.61                                                                      | 0.52/-0.50                                                                      |



Table S2: Continues

| <b>Structure</b>                                             | <b>4</b>                                                                          | <b>5</b>                                                                                      | <b>6</b>                                                                                         |
|--------------------------------------------------------------|-----------------------------------------------------------------------------------|-----------------------------------------------------------------------------------------------|--------------------------------------------------------------------------------------------------|
| CCDC deposition number                                       | 2309438                                                                           | 2309439                                                                                       | 2309440                                                                                          |
| Empirical formula                                            | C <sub>76</sub> H <sub>55</sub> N <sub>14</sub> Ni <sub>2</sub> O <sub>10.5</sub> | C <sub>72</sub> H <sub>44</sub> Cu <sub>8</sub> N <sub>8</sub> O <sub>32</sub> S <sub>4</sub> | C <sub>134</sub> H <sub>146</sub> N <sub>26</sub> Ni <sub>3</sub> O <sub>34</sub> S <sub>2</sub> |
| Formula weight                                               | 1449.76                                                                           | 2169.71                                                                                       | 2905.01                                                                                          |
| Temperature/K                                                | 120.01(10)                                                                        | 120.15                                                                                        | 120.15                                                                                           |
| Crystal system                                               | triclinic                                                                         | triclinic                                                                                     | monoclinic                                                                                       |
| Space group                                                  | <i>P</i> -1                                                                       | <i>P</i> -1                                                                                   | <i>P</i> <sub>2</sub> <sub>1</sub> / <i>n</i>                                                    |
| <i>a</i> /Å                                                  | 11.2569(11)                                                                       | 10.1534(2)                                                                                    | 13.63110(10)                                                                                     |
| <i>b</i> /Å                                                  | 13.4025(17)                                                                       | 10.8388(2)                                                                                    | 30.64140(10)                                                                                     |
| <i>c</i> /Å                                                  | 13.5086(13)                                                                       | 17.2424(2)                                                                                    | 16.96660(10)                                                                                     |
| $\alpha$ /°                                                  | 61.328(11)                                                                        | 88.5480(10)                                                                                   | 90                                                                                               |
| $\beta$ /°                                                   | 71.172(9)                                                                         | 89.922(2)                                                                                     | 104.0130(10)                                                                                     |
| $\gamma$ /°                                                  | 75.382(10)                                                                        | 84.669(2)                                                                                     | 90                                                                                               |
| Volume/Å <sup>3</sup>                                        | 1680.8(4)                                                                         | 1888.72(6)                                                                                    | 6875.65(7)                                                                                       |
| <i>Z</i>                                                     | 1                                                                                 | 1                                                                                             | 2                                                                                                |
| $\rho_{\text{calc}}$ /cm <sup>3</sup>                        | 1.432                                                                             | 1.908                                                                                         | 1.403                                                                                            |
| $\mu$ /mm <sup>-1</sup>                                      | 1.309                                                                             | 4.302                                                                                         | 1.489                                                                                            |
| <i>F</i> (000)                                               | 749.0                                                                             | 1084.0                                                                                        | 3040.0                                                                                           |
| Crystal size/mm <sup>3</sup>                                 | 0.101 × 0.02 × 0.016                                                              | 0.043 × 0.024 × 0.019                                                                         | 0.151 × 0.111 × 0.081                                                                            |
| 2 $\Theta$ range for data collection/°                       | 7.57 to 147.988                                                                   | 5.126 to 159.054                                                                              | 5.768 to 158.152                                                                                 |
| Reflections collected                                        | 24885                                                                             | 34793                                                                                         | 75492                                                                                            |
| Independent reflections                                      | 6775 [ <i>R</i> <sub>int</sub> = 0.0842,<br><i>R</i> <sub>sigma</sub> = 0.0686]   | 8038 [ <i>R</i> <sub>int</sub> = 0.0412,<br><i>R</i> <sub>sigma</sub> = 0.0309]               | 14648 [ <i>R</i> <sub>int</sub> = 0.0264,<br><i>R</i> <sub>sigma</sub> = 0.0203]                 |
| Data/restraints/parameters                                   | 6775/0/487                                                                        | 8038/39/556                                                                                   | 14648/0/935                                                                                      |
| Goodness-of-fit on <i>F</i> <sup>2</sup>                     | 1.078                                                                             | 1.031                                                                                         | 1.063                                                                                            |
| Final <i>R</i> indexes [ <i>I</i> ≥ 2 $\sigma$ ( <i>I</i> )] | <i>R</i> <sub>1</sub> = 0.0644,<br><i>wR</i> <sub>2</sub> = 0.1346                | <i>R</i> <sub>1</sub> = 0.0438,<br><i>wR</i> <sub>2</sub> = 0.1075                            | <i>R</i> <sub>1</sub> = 0.0506,<br><i>wR</i> <sub>2</sub> = 0.1334                               |
| Final <i>R</i> indexes [all data]                            | <i>R</i> <sub>1</sub> = 0.0989,<br><i>wR</i> <sub>2</sub> = 0.1493                | <i>R</i> <sub>1</sub> = 0.0526,<br><i>wR</i> <sub>2</sub> = 0.1118                            | <i>R</i> <sub>1</sub> = 0.0546,<br><i>wR</i> <sub>2</sub> = 0.1366                               |
| Largest diff. peak/hole / e Å <sup>-3</sup>                  | 0.87/-0.48                                                                        | 1.04/-0.91                                                                                    | 1.15/-0.82                                                                                       |

Table S2: Continues

| <b>Structure</b>                                              | <b>6B (-153 °C)</b>                                                                              | <b>6B (0 °C)</b>                                                                                 |
|---------------------------------------------------------------|--------------------------------------------------------------------------------------------------|--------------------------------------------------------------------------------------------------|
| CCDC deposition number                                        | 2309441                                                                                          | 2309442                                                                                          |
| Empirical formula                                             | C <sub>128</sub> H <sub>136</sub> N <sub>24</sub> Ni <sub>3</sub> O <sub>34</sub> S <sub>2</sub> | C <sub>128</sub> H <sub>132</sub> N <sub>24</sub> Ni <sub>3</sub> O <sub>32</sub> S <sub>2</sub> |
| Formula weight                                                | 2794.85                                                                                          | 2758.82                                                                                          |
| Temperature/K                                                 | 120.00(10)                                                                                       | 273.00(10)                                                                                       |
| Crystal system                                                | monoclinic                                                                                       | monoclinic                                                                                       |
| Space group                                                   | <i>P2<sub>1</sub>/n</i>                                                                          | <i>P2<sub>1</sub>/n</i>                                                                          |
| <i>a</i> /Å                                                   | 13.61780(10)                                                                                     | 13.5935(3)                                                                                       |
| <i>b</i> /Å                                                   | 29.7718(2)                                                                                       | 29.6842(9)                                                                                       |
| <i>c</i> /Å                                                   | 17.1157(2)                                                                                       | 17.6639(5)                                                                                       |
| $\alpha$ /°                                                   | 90                                                                                               | 90                                                                                               |
| $\beta$ /°                                                    | 104.0980(10)                                                                                     | 104.823(3)                                                                                       |
| $\gamma$ /°                                                   | 90                                                                                               | 90                                                                                               |
| Volume/Å <sup>3</sup>                                         | 6730.15(11)                                                                                      | 6890.4(3)                                                                                        |
| <i>Z</i>                                                      | 2                                                                                                | 2                                                                                                |
| $\rho_{\text{calc}}$ /cm <sup>3</sup>                         | 1.379                                                                                            | 1.330                                                                                            |
| $\mu$ /mm <sup>-1</sup>                                       | 1.495                                                                                            | 1.442                                                                                            |
| <i>F</i> (000)                                                | 2920.0                                                                                           | 2880.0                                                                                           |
| Crystal size/mm <sup>3</sup>                                  | 0.178 × 0.123 × 0.108                                                                            | 0.128 × 0.072 × 0.055                                                                            |
| 2 $\Theta$ range for data collection/°                        | 5.938 to 158.146                                                                                 | 5.954 to 158.89                                                                                  |
| Reflections collected                                         | 73390                                                                                            | 74695                                                                                            |
| Independent reflections                                       | 14350 [ <i>R</i> <sub>int</sub> = 0.0298,<br><i>R</i> <sub>sigma</sub> = 0.0218]                 | 14655 [ <i>R</i> <sub>int</sub> = 0.0753,<br><i>R</i> <sub>sigma</sub> = 0.0404]                 |
| Data/restraints/parameters                                    | 14350/55/623                                                                                     | 14655/7/689                                                                                      |
| Goodness-of-fit on <i>F</i> <sup>2</sup>                      | 1.083                                                                                            | 1.053                                                                                            |
| Final <i>R</i> indexes [ <i>I</i> >= 2 $\sigma$ ( <i>I</i> )] | <i>R</i> <sub>1</sub> = 0.0857, <i>wR</i> <sub>2</sub> = 0.2222                                  | <i>R</i> <sub>1</sub> = 0.0809, <i>wR</i> <sub>2</sub> = 0.2226                                  |
| Final <i>R</i> indexes [all data]                             | <i>R</i> <sub>1</sub> = 0.0911, <i>wR</i> <sub>2</sub> = 0.2267                                  | <i>R</i> <sub>1</sub> = 0.0943, <i>wR</i> <sub>2</sub> = 0.2324                                  |
| Largest diff. peak/hole / e Å <sup>-3</sup>                   | 1.72/-1.57                                                                                       | 1.36/-1.28                                                                                       |

Table S3: Selected bond lengths (Å) and angles (°) for structure **1**

|                 |            |               |            |
|-----------------|------------|---------------|------------|
| Cu1-O13         | 1.9744(14) | Cu1-N26       | 1.9801(18) |
| Cu1-O24#1       | 2.0173(14) | Cu1-N1        | 1.9815(18) |
| Cu1-O25#1       | 2.7128(17) | Cu1-N22#2     | 2.2999(18) |
| O13-Cu1-O24#1   | 155.40(6)  | O13-Cu1-N26   | 91.08(7)   |
| O13-Cu1-O25#1   | 101.78(6)  | O13-Cu1-N1    | 87.91(7)   |
| O24#1-Cu1-O25#1 | 53.62(5)   | O13-Cu1-N22#2 | 107.59(7)  |
| O24#1-Cu1-N22#2 | 97.00(6)   | N26-Cu1-N1    | 174.30(8)  |

Symmetry codes: #1 1+X,+Y,+Z; #2 1/2+X,1/2-Y,1/2+Z;

Table S4: Selected bond lengths (Å) and angles (°) for structure **2**

|                 |           |               |            |
|-----------------|-----------|---------------|------------|
| Ni1-O13         | 2.008(2)  | Ni1-N26       | 2.052(3)   |
| Ni1-O24#1       | 2.078(2)  | Ni1-N1        | 2.040(3)   |
| Ni1-O25#1       | 2.278(2)  | Ni1-N22#2     | 2.113(3)   |
| O13-Ni1-O24#1   | 162.97(9) | O13-Ni1-N26   | 90.55(10)  |
| O13-Ni1-O25#1   | 102.48(9) | O13-Ni1-N1    | 88.16(10)  |
| O24#1-Ni1-O25#1 | 60.50(8)  | O13-Ni1-N22#2 | 101.34(10) |
| O24#1-Ni1-N22#2 | 95.65(10) | N1-Ni1-N26    | 175.69(11) |

Symmetry codes: #1 -1+X,+Y,+Z; #2 -1/2+X,1/2-Y,-1/2+Z

Table S5: Selected bond lengths (Å) and angles (°) for structure **3**

|             |            |               |            |
|-------------|------------|---------------|------------|
| Cu1-O1      | 1.9607(15) | Cu2-O32       | 1.9514(17) |
| Cu1-O1#1    | 1.9607(15) | Cu2-O32#2     | 1.9513(17) |
| Cu1-N8#1    | 1.9923(19) | Cu2-N30#2     | 2.0153(19) |
| Cu1-O2      | 2.6044(19) | Cu2-O40       | 2.535(2)   |
| Cu1-N8      | 1.9922(19) | Cu2-N30       | 2.0153(19) |
| O1-Cu1-N8#1 | 89.64(7)   | O32-Cu2-N30   | 91.19(8)   |
| O1-Cu1-N8   | 90.36(7)   | O32-Cu2-N30#2 | 88.81(8)   |
| O2-Cu1-N8   | 91.34(8)   | O40-Cu2-O32   | 89.29(8)   |
| O2-Cu1-N8#1 | 88.66(8)   | O40-Cu2-N30   | 85.20(8)   |

Symmetry codes: #1 1-X,-Y,-Z; #2 3-X,2-Y,1-Z

Table S6: Selected bond lengths (Å) and angles (°) for structure 4

|              |           |               |           |
|--------------|-----------|---------------|-----------|
| Ni1-O1       | 2.058(2)  | Ni2-O32       | 2.029(2)  |
| Ni1-N8       | 2.084(3)  | Ni2-O51       | 2.105(3)  |
| Ni1-N20      | 2.111(3)  | Ni2-N39       | 2.055(3)  |
| O1-Ni1-N8    | 86.97(10) | O32-Ni2-O51#2 | 87.29(10) |
| O1-Ni1-N8#1  | 93.04(10) | O32-Ni2-O51   | 92.71(10) |
| O1-Ni1-N20#1 | 84.93(10) | O32-Ni2-N39   | 91.80(11) |
| O1-Ni1-N20   | 95.07(10) | O32-Ni2-N39#2 | 88.20(11) |
| N8-Ni1-N20   | 85.19(11) | N39-Ni2-O51#2 | 90.79(11) |
| N8-Ni1-N20#1 | 94.81(11) | N39-Ni2-O51   | 89.21(11) |

Symmetry codes: #1 2-X,1-Y,-Z; #2 1-X,2-Y,-Z

Table S7: Selected bond lengths (Å) and angles (°) for structure 5

|               |            |                 |            |
|---------------|------------|-----------------|------------|
| Cu1-N1        | 1.985(3)   | Cu3-O26         | 2.295(3)   |
| Cu1-O13       | 1.950(2)   | Cu3-N30         | 2.003(3)   |
| Cu1-O14       | 1.951(2)   | Cu3-O42         | 1.968(2)   |
| Cu1-O28#3     | 1.967(2)   | Cu3-O43         | 1.931(2)   |
| Cu1-O53A#4    | 2.325(3)   | Cu3-O57#3       | 1.931(2)   |
| Cu2-O13       | 2.007(2)   | Cu4-O24#2       | 2.392(2)   |
| Cu2-O13#5     | 1.994(2)   | Cu4-O42#1       | 1.983(2)   |
| Cu2-O29#6     | 1.942(2)   | Cu4-O42#2       | 2.003(2)   |
| Cu2-O15       | 1.940(2)   | Cu4-O45#1       | 1.935(2)   |
| Cu2-O54A#4    | 2.345(3)   | Cu4-O58         | 1.940(2)   |
| O13-Cu1-N1    | 171.95(11) | O42-Cu3-N30     | 173.32(12) |
| O14-Cu1-O28#3 | 154.68(12) | O43-Cu3-O57#3   | 155.72(12) |
| O15-Cu2-O13#5 | 176.67(10) | O58-Cu4-O42#1   | 175.89(10) |
| O29#6-Cu2-O13 | 164.28(10) | O45#1-Cu4-O42#2 | 164.25(10) |

Symmetry codes: #1 1-X,2-Y,2-Z; #2 +X,1+Y,+Z; #3 +X,-1+Y,+Z; #4 -1+X,-1+Y,+Z; #5 -X,-Y,1-Z; #6 -X,1-Y,1-Z

Table S8: Selected bond lengths (Å) and angles (°) for structure **6**

|                 |            |               |            |
|-----------------|------------|---------------|------------|
| Ni1-O72#1       | 2.1284(14) | Ni2-O61       | 2.0578(14) |
| Ni1-N1          | 2.0909(17) | Ni2-O76#3     | 2.0616(15) |
| Ni1-N13         | 2.0784(17) | Ni2-O77       | 2.0806(14) |
| N1#2-Ni1-O72#1  | 86.81(6)   | Ni2-N34       | 2.0789(17) |
| N1-Ni1-O72#1    | 93.19(6)   | Ni2-N37       | 2.0955(17) |
| N13-Ni1-O72#1   | 90.65(6)   | Ni2-N58#4     | 2.0968(18) |
| N13#2-Ni1-O72#1 | 89.35(6)   | O61-Ni2-O77   | 88.44(6)   |
| N13-Ni1-N1#2    | 86.96(7)   | O61-Ni2-N34   | 85.63(6)   |
| N13-Ni1-N1      | 93.05(7)   | O61-Ni2-N58#4 | 99.18(7)   |
| O61-Ni2-O76#3   | 175.31(6)  | N34-Ni2-O77   | 173.47(6)  |

Symmetry codes: #1 +X,+Y,1+Z; #2 1-X,1-Y,2-Z; #3 1/2+X,3/2-Y,1/2+Z; #4 1+X,+Y,+Z;

Table S9: Selected bond lengths (Å) and angles (°) for structure **6B (-153 °C)**

|                 |            |               |            |
|-----------------|------------|---------------|------------|
| Ni1-O72#1       | 2.100(3)   | Ni2-O75#4     | 2.024(2)   |
| Ni1-N1          | 2.090(3)   | Ni2-O77       | 2.102(3)   |
| Ni1-N13         | 2.089(3)   | Ni2-O61       | 2.029(3)   |
| N1#3-Ni1-O72#2  | 85.14(11)  | Ni2-N58#5     | 2.096(3)   |
| N1-Ni1-O72#2    | 94.86(11)  | Ni2-N34       | 2.099(3)   |
| N13-Ni1-O72#1   | 90.78(11)  | Ni2-N37       | 2.077(3)   |
| N13#3-Ni1-O72#1 | 89.21(11)  | O61-Ni2-O77   | 90.76(11)  |
| N13-Ni1-N1#3    | 93.08(10)  | O61-Ni2-N58#5 | 88.65(15)  |
| N13-Ni1-N1      | 86.92(10)  | O61-Ni2-N34   | 93.97(11)  |
| O75#4-Ni2-O61   | 178.54(12) | N34-Ni2-O77   | 175.18(11) |

Symmetry codes: #1 1/2+X,1/2-Y,-1/2+Z; #2 3/2-X,1/2+Y,1/2-Z; #3 2-X,1-Y,-Z; #4 1/2+X,1/2-Y,1/2+Z; #5 1+X,+Y,+Z

Table S10: Selected bond lengths (Å) and angles (°) for structure **6B (0 °C)**

|                 |            |               |            |
|-----------------|------------|---------------|------------|
| Ni1-O71#1       | 2.112(3)   | Ni2-O76#4     | 2.054(2)   |
| Ni1-N1          | 2.097(3)   | Ni2-O77       | 2.108(3)   |
| Ni1-N13         | 2.087(3)   | Ni2-O61       | 2.037(2)   |
| N1#3-Ni1-O71#2  | 86.11(11)  | Ni2-N58#5     | 2.103(3)   |
| N1-Ni1-O71#2    | 93.89(11)  | Ni2-N34       | 2.101(3)   |
| N13-Ni1-O71#1   | 90.36(11)  | Ni2-N37       | 2.077(3)   |
| N13#3-Ni1-O71#1 | 89.64(11)  | O61-Ni2-O77   | 89.17(10)  |
| N13-Ni1-N1#3    | 87.54(11)  | O61-Ni2-N58#5 | 89.83(12)  |
| N13-Ni1-N1      | 92.45(11)  | O61-Ni2-N34   | 86.97(11)  |
| O61-Ni2-O76#4   | 178.96(11) | N34-Ni2-O77   | 175.99(11) |

Symmetry codes: #1 1-X,1-Y,1-Z; #2 +X,+Y,-1+Z; #3 1-X,1-Y,-Z; #4 -1/2+X,1/2-Y,-1/2+Z; #5 1+X,+Y,+Z;

Table S11: Hydrogen bond table of structure 1

| <b>D</b> | <b>H</b> | <b>A</b> | <b>d(D-H)/Å</b> | <b>d(H-A)/Å</b> | <b>d(D-A)/Å</b> | <b>D-H-A/°</b> |
|----------|----------|----------|-----------------|-----------------|-----------------|----------------|
| O38      | H38A     | O39      | 0.85            | 1.94            | 2.784(3)        | 173.8          |
| O38      | H38B     | O24      | 0.85            | 1.98            | 2.787(2)        | 157.0          |
| N22      | H22B     | O38#1    | 0.99            | 2.05            | 2.968(3)        | 153.7          |
| O40B     | H40A     | O15      | 0.85            | 1.95            | 2.785(11)       | 166.5          |
| O39      | H39A     | O40A     | 0.85            | 2.19            | 2.992(8)        | 156.3          |
| O39      | H39B     | O25#2    | 0.85            | 1.98            | 2.825(3)        | 170.4          |
| O40A     | H40C     | O15      | 0.85            | 1.93            | 2.625(11)       | 138.6          |

Symmetry codes: #1 1/2+X,1/2-Y,-1/2+Z; #2 1/2+X,1/2-Y,1/2+Z

Table S12: Hydrogen bond table of structure 2

| <b>D</b> | <b>H</b> | <b>A</b> | <b>d(D-H)/Å</b> | <b>d(H-A)/Å</b> | <b>d(D-A)/Å</b> | <b>D-H-A/°</b> |
|----------|----------|----------|-----------------|-----------------|-----------------|----------------|
| O39      | H39A     | O24#1    | 0.87            | 1.86            | 2.711(3)        | 163.9          |
| O39      | H39B     | O38B     | 0.87            | 2.03            | 2.877(10)       | 163.3          |
| O39      | H39B     | O38A     | 0.87            | 1.94            | 2.796(5)        | 169.6          |
| O38A     | H38C     | O25      | 0.87            | 2.02            | 2.887(5)        | 177.2          |
| O38A     | H38D     | O15#1    | 0.87            | 2.11            | 2.977(6)        | 172.3          |
| O40A     | H40A     | O40A#2   | 0.87            | 2.39            | 2.99(2)         | 127.0          |

Symmetry codes: #1 1/2+X,1/2-Y,1/2+Z; #2 2-X,-Y,2-Z

Table S13: Hydrogen bond table of structure 3

| <b>D</b> | <b>H</b> | <b>A</b> | <b>d(D-H)/Å</b> | <b>d(H-A)/Å</b> | <b>d(D-A)/Å</b> | <b>D-H-A/°</b> |
|----------|----------|----------|-----------------|-----------------|-----------------|----------------|
| O40      | H40A     | O33#1    | 0.87            | 1.90            | 2.716(3)        | 154.8          |
| O40      | H40B     | O2#2     | 0.87            | 2.00            | 2.851(3)        | 164.7          |
| O39      | H39A     | O1#3     | 0.87            | 2.01            | 2.873(3)        | 168.7          |
| O39      | H39B     | O40      | 0.87            | 2.02            | 2.877(3)        | 168.5          |
| N6       | H6B      | O2       | 0.89            | 1.94            | 2.636(5)        | 134.3          |

Symmetry codes: #1 3-X,2-Y,1-Z; #2 2-X,1-Y,1-Z; #3 1+X,1+Y,1+Z

Table S14: Hydrogen bond table of structure 4

| <b>D</b> | <b>H</b> | <b>A</b> | <b>d(D-H)/Å</b> | <b>d(H-A)/Å</b> | <b>d(D-A)/Å</b> | <b>D-H-A/°</b> |
|----------|----------|----------|-----------------|-----------------|-----------------|----------------|
| O51      | H51A     | O33      | 0.87            | 1.86            | 2.641(4)        | 148.7          |
| O51      | H51B     | O2       | 0.87            | 1.95            | 2.785(3)        | 158.7          |
| N7       | H7A      | O1#1     | 0.89            | 1.92            | 2.645(7)        | 137.7          |
| N7       | H7B      | O33      | 0.89            | 2.32            | 2.898(7)        | 122.6          |
| N38      | H38A     | O33#2    | 0.89            | 1.93            | 2.636(9)        | 134.7          |

Symmetry codes: #1 1-X,1-Y,-Z; #2 -X,2-Y,-Z

Table S15: Hydrogen bond table of structure 5

| <b>D</b> | <b>H</b> | <b>A</b> | <b>d(D-H)/Å</b> | <b>d(H-A)/Å</b> | <b>d(D-A)/Å</b> | <b>D-H-A/°</b> |
|----------|----------|----------|-----------------|-----------------|-----------------|----------------|
| O13      | H13      | O55A#1   | 1.00            | 1.91            | 2.781(3)        | 143.7          |
| O13      | H13      | O55B#1   | 1.00            | 1.87            | 2.71(2)         | 139.2          |
| O42      | H42      | O25#2    | 1.00            | 1.89            | 2.772(3)        | 145.2          |
| C34      | H34      | O26      | 0.95            | 2.37            | 2.969(4)        | 120.7          |

Symmetry codes: #1 1-X,1-Y,1-Z; #2 1-X,1-Y,2-Z

Table S16: Hydrogen bond table of structure 6

| <b>D</b> | <b>H</b> | <b>A</b> | <b>d(D-H)/Å</b> | <b>d(H-A)/Å</b> | <b>d(D-A)/Å</b> | <b>D-H-A/°</b> |
|----------|----------|----------|-----------------|-----------------|-----------------|----------------|
| O77      | H77A     | O62      | 0.85            | 1.95            | 2.675(2)        | 142.7          |
| O77      | H77B     | O75#1    | 0.85            | 1.94            | 2.698(2)        | 147.8          |
| O94      | H94A     | O97      | 0.85            | 1.94            | 2.709(3)        | 150.5          |
| O94      | H94B     | O75      | 0.85            | 2.07            | 2.863(2)        | 155.5          |
| O95      | H95A     | O94      | 0.85            | 1.97            | 2.807(3)        | 168.3          |
| O95      | H95B     | O62#2    | 0.85            | 2.08            | 2.905(2)        | 164.3          |
| O96      | H96A     | O95      | 0.85            | 1.97            | 2.801(3)        | 165.4          |
| O97      | H97A     | O96      | 0.85            | 1.92            | 2.765(4)        | 173.6          |
| O97      | H97B     | O98A     | 0.85            | 1.98            | 2.751(5)        | 149.6          |
| O83      | H83A     | O82      | 0.85            | 1.90            | 2.735(5)        | 168.4          |
| O83      | H83B     | O82#3    | 0.85            | 2.19            | 2.998(5)        | 160.0          |

Symmetry codes: #1 1/2+X,3/2-Y,1/2+Z; #2 -1/2+X,3/2-Y,-1/2+Z; #3 1-X,1-Y,1-Z

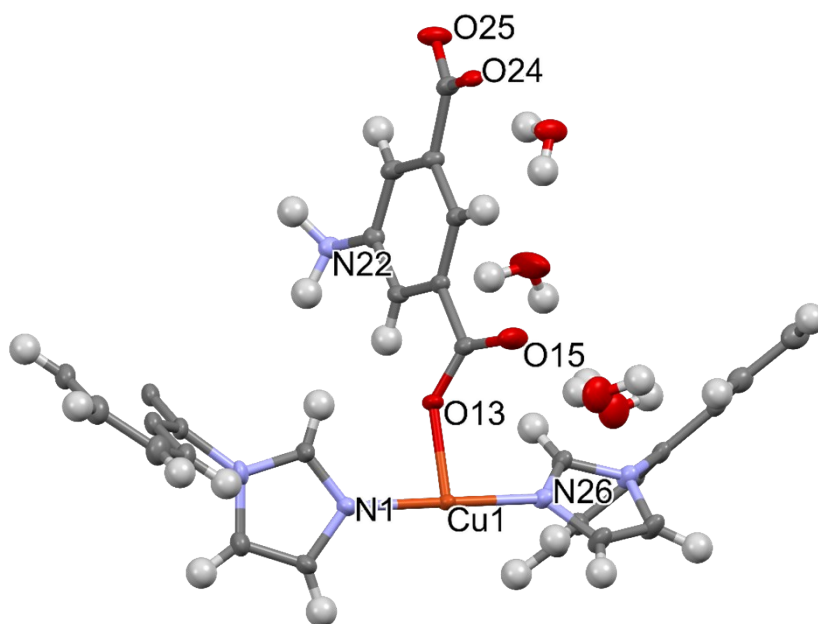

Figure S8. Asymmetric unit of structure **1**. Thermal ellipsoids of atoms are presented at 50 % probability level.

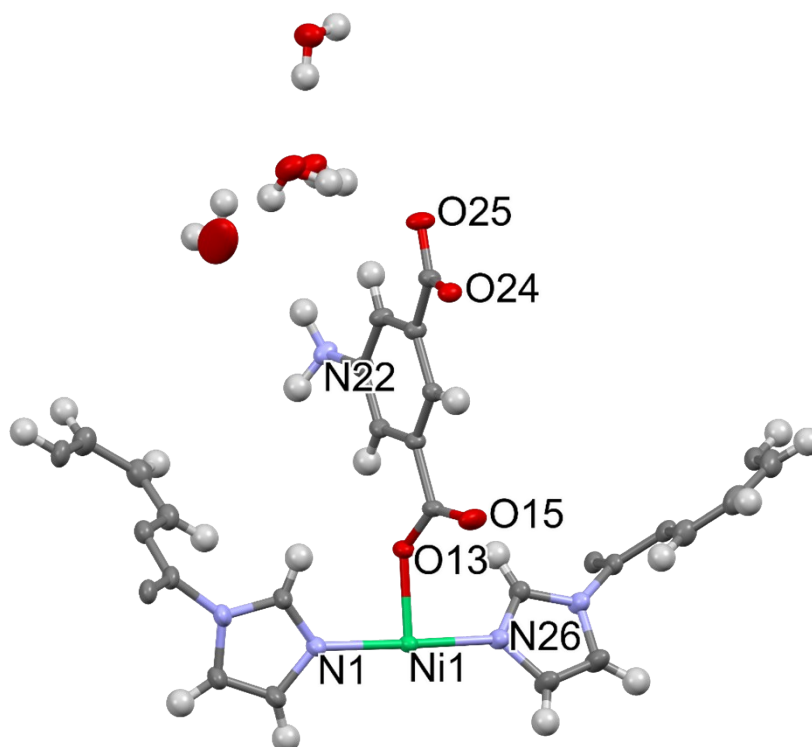

Figure S9. Asymmetric unit of structure **2**. Thermal ellipsoids of atoms are presented at 50 % probability level. The enlarged water molecule is disordered with partial occupancy of 0.5 but possibly due to its volatile nature the other half could not be found from the electron density maps.



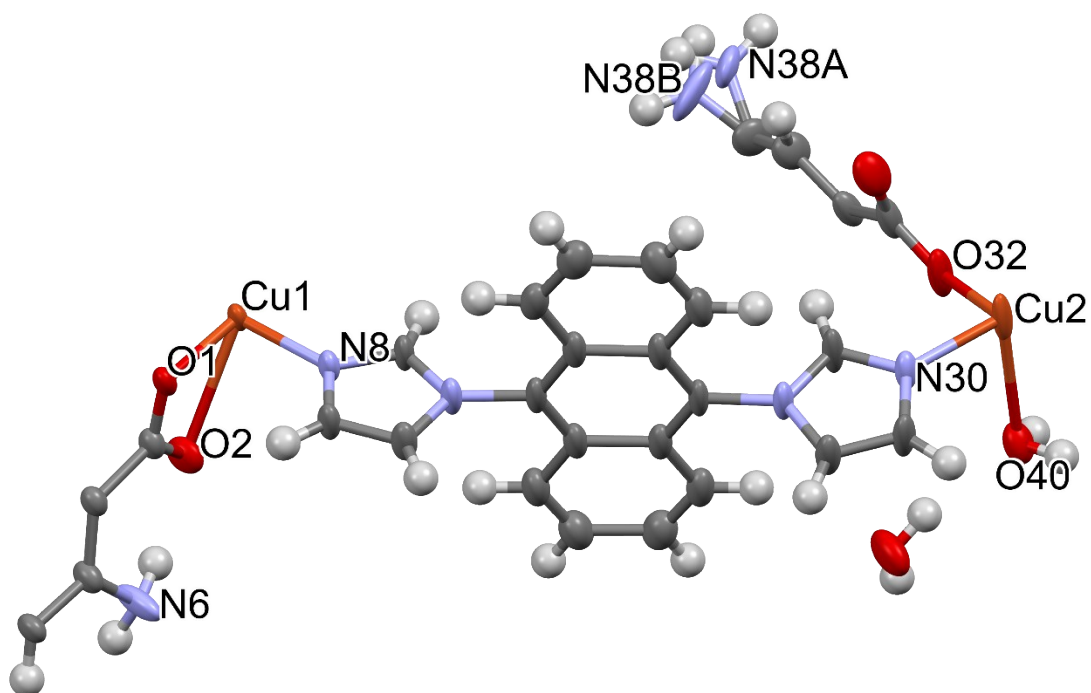

Figure S10. Asymmetric unit of structure **3**. Thermal ellipsoids of atoms are presented at 50 % probability level.

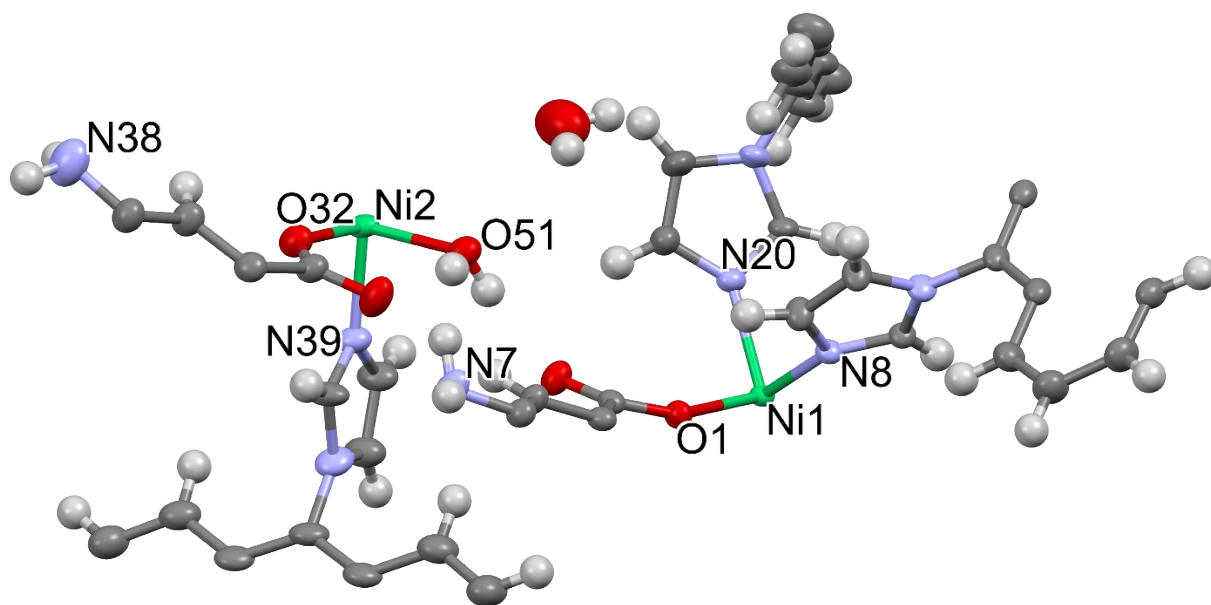

Figure S11. Asymmetric unit of structure **4**. Thermal ellipsoids of atoms are presented at 50 % probability level.

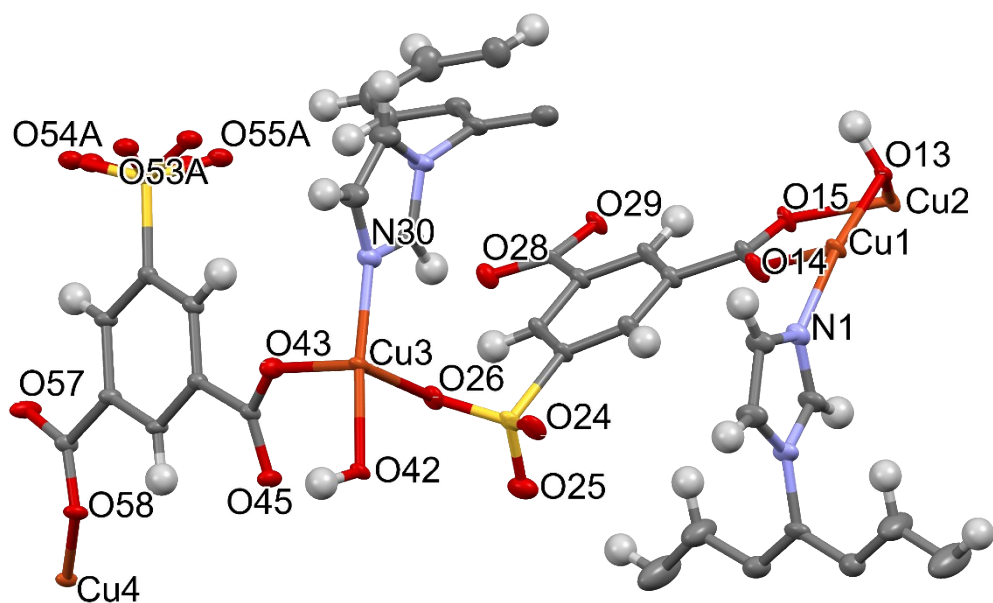

Figure S12. Asymmetric unit of structure **5**. Thermal ellipsoids of atoms are presented at 50 % probability level.

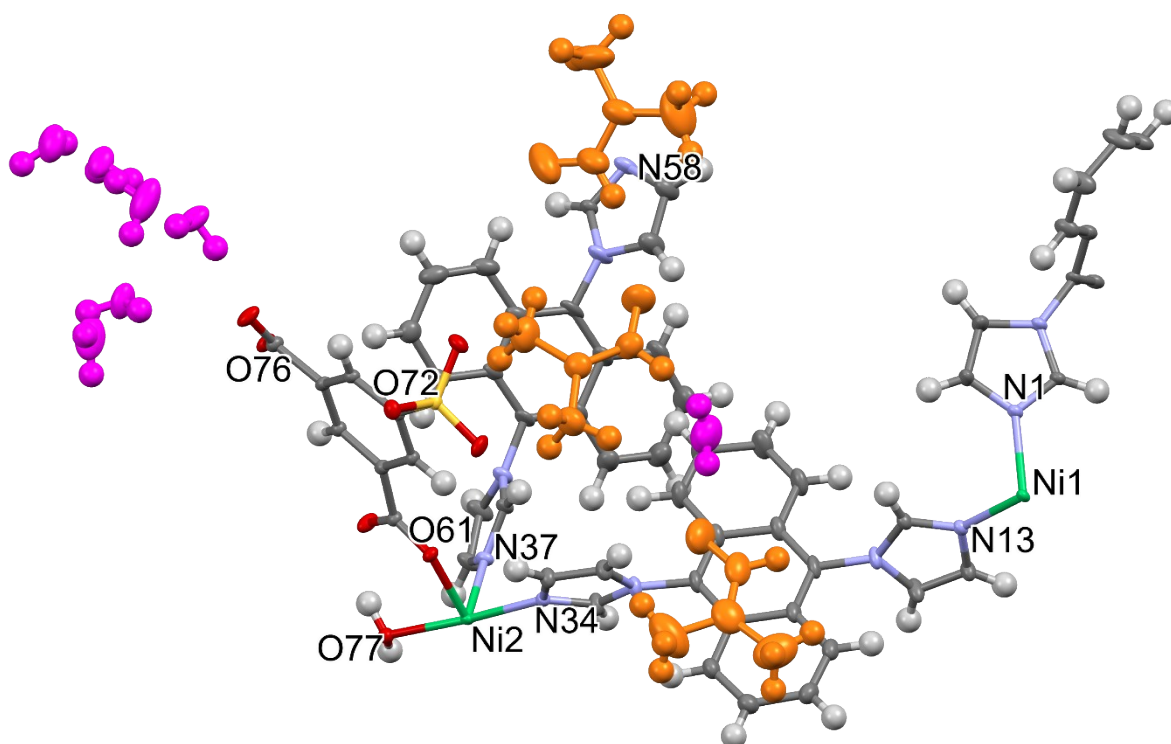

Figure S13. Asymmetric unit of structure **6**. Uncoordinated DMF and water molecules are coloured in orange and purple, respectively. Thermal ellipsoids of atoms are presented at 50 % probability level.

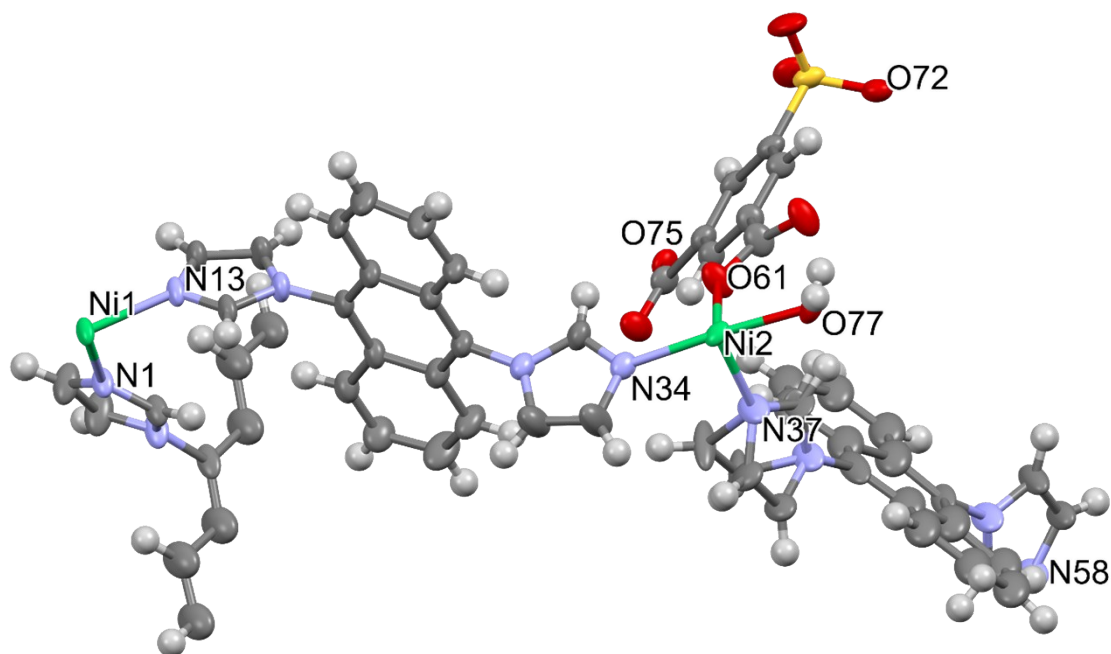

Figure S14. Asymmetric unit of structure **6B** (-153 °C). Uncoordinated solvent molecules removed by Olex2 solvent mask. Thermal ellipsoids of atoms are presented at 50 % probability level.

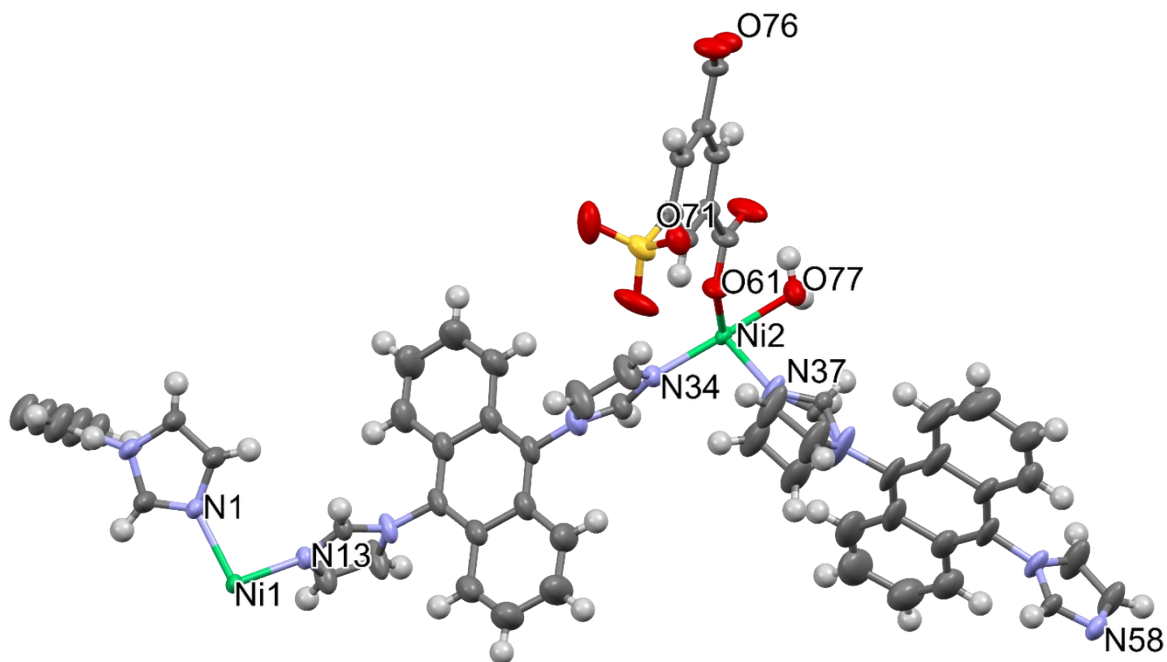

Figure S15. Asymmetric unit of structure **6B** (0 °C). Uncoordinated solvent molecules removed by Olex2 solvent mask. Thermal ellipsoids of atoms are presented at 50 % probability level.

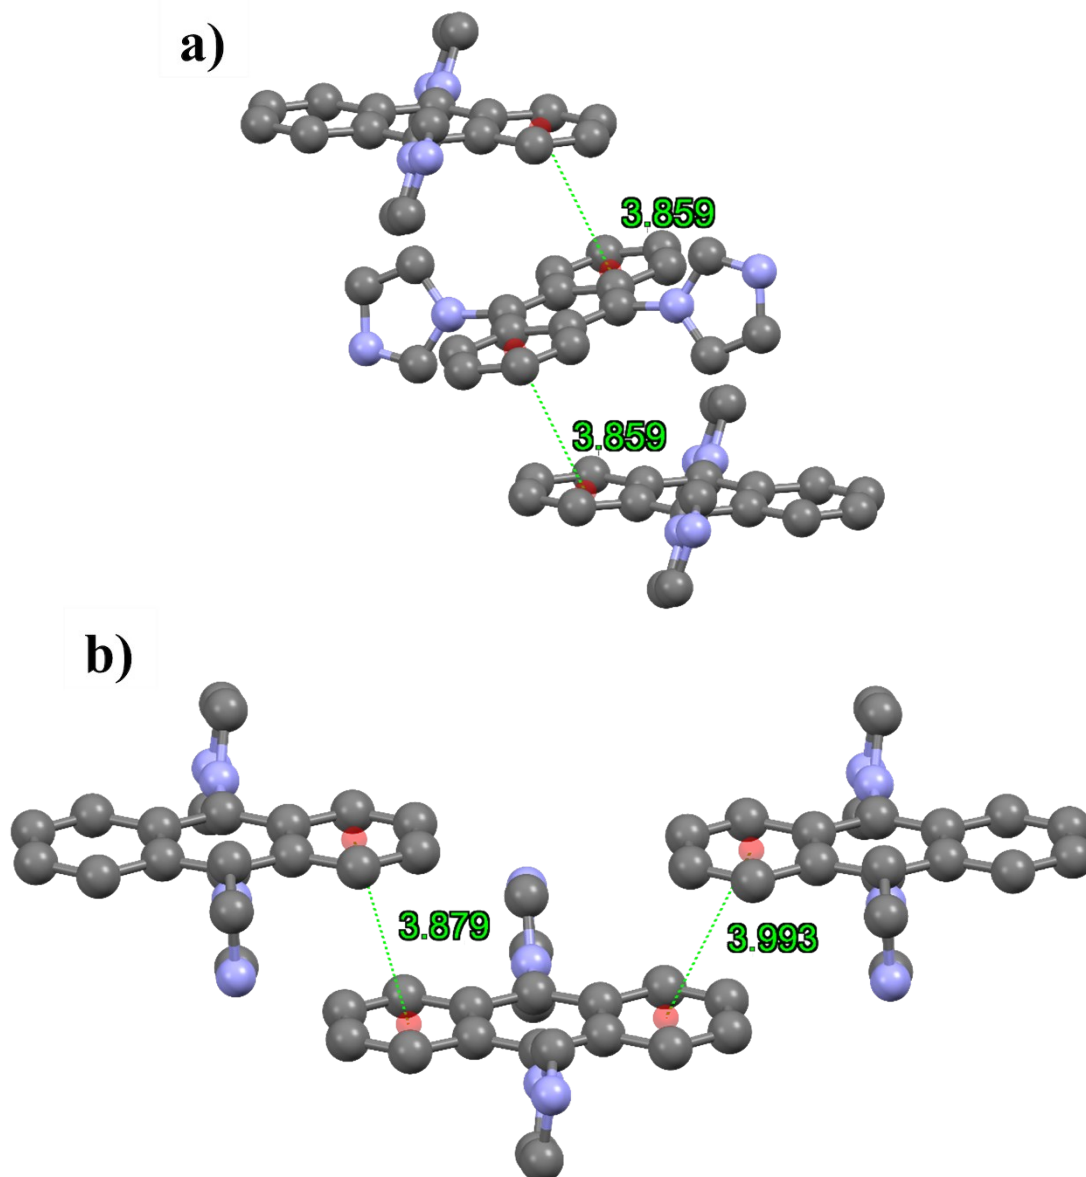

Figure S16. a)  $\pi$ - $\pi$  interactions between the anthracene rings in structure **1**. b)  $\pi$ - $\pi$  interactions between the anthracene rings in structure **3**.

## PXRD patterns and FT-IR spectra of the synthesized bulk products

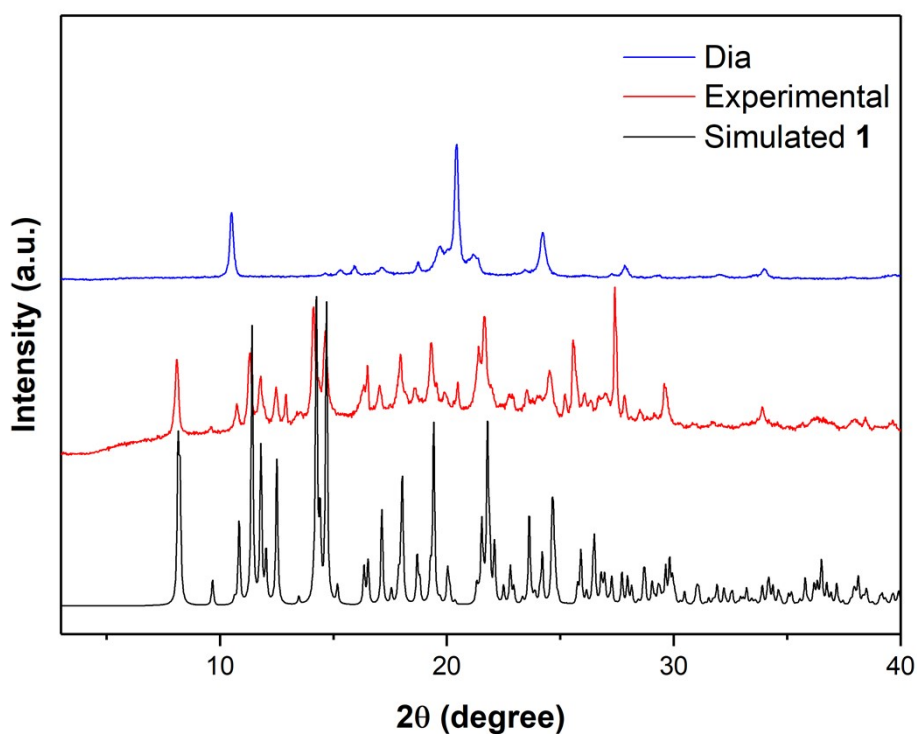

Figure S17. PXRD pattern comparison of neutral dia ligand, impure powder mixture of **1**, and the simulated pattern of **1** from the SCXRD data.

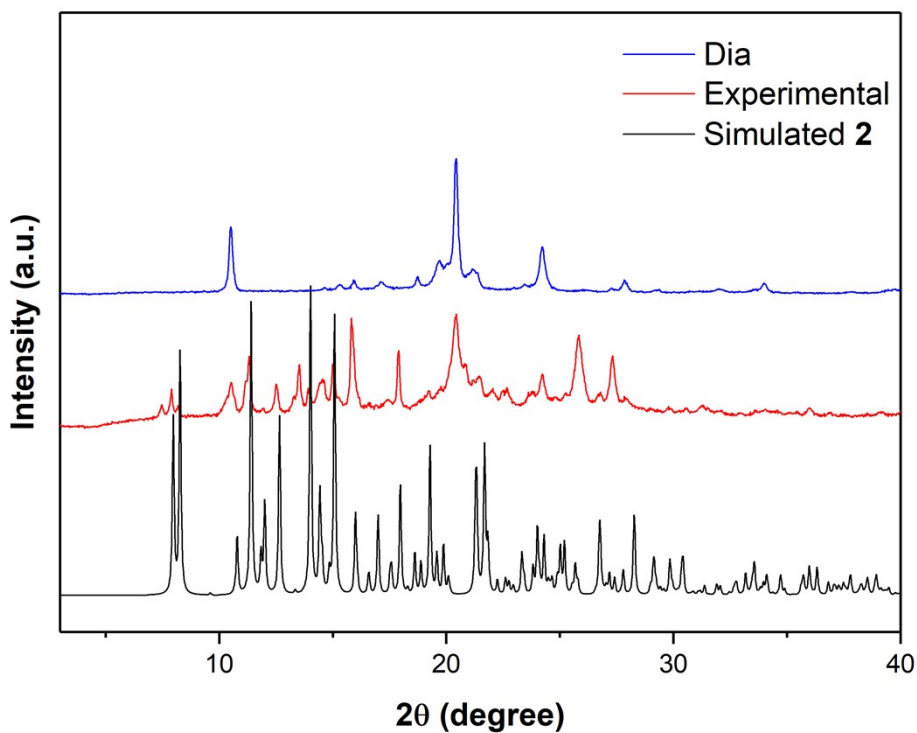

Figure S18. PXRD pattern comparison of neutral dia ligand, impure powder mixture of **2**, and the simulated pattern of **2** from the SCXRD data.

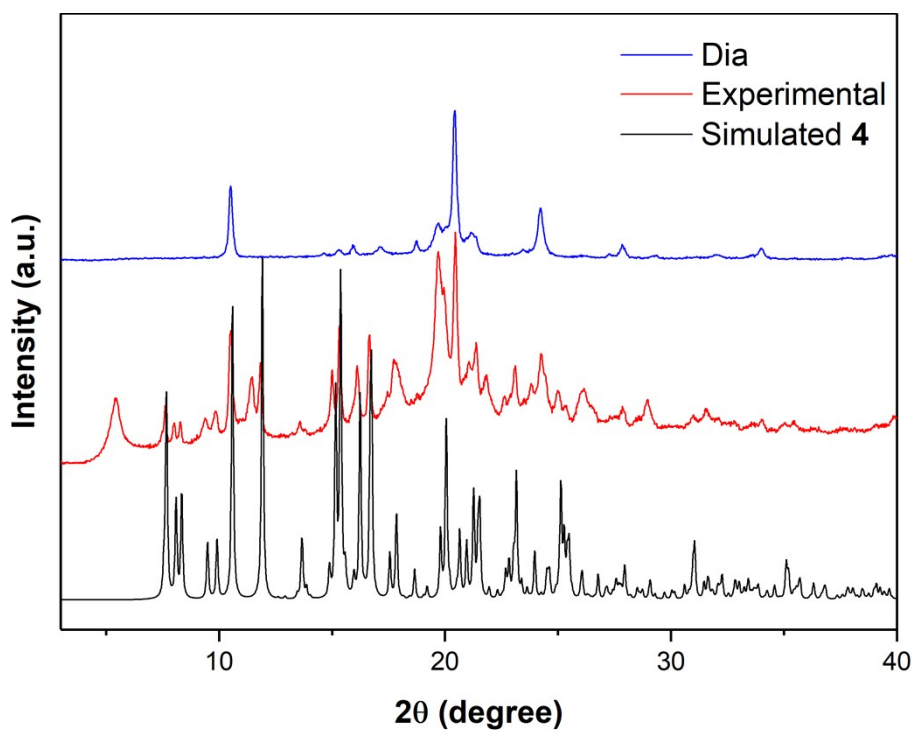

Figure S19. PXRD pattern comparison of neutral dia ligand, impure powder mixture of **4**, and the simulated pattern of **4** from the SCXRD data.

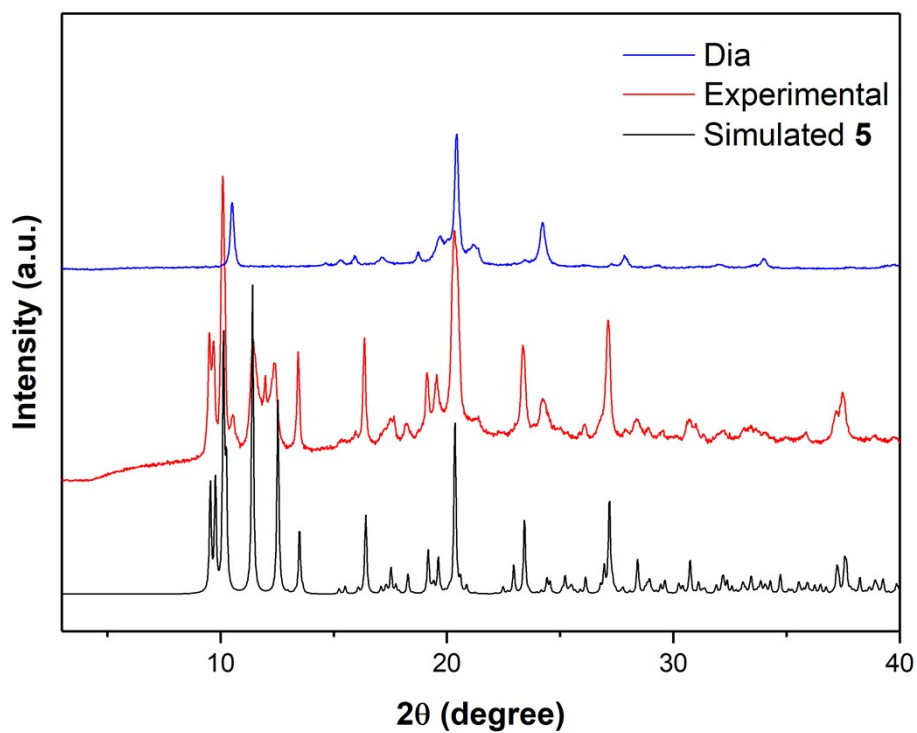

Figure S20. PXRD pattern comparison of neutral dia ligand, impure powder mixture of **5**, and the simulated pattern of **5** from the SCXRD data.

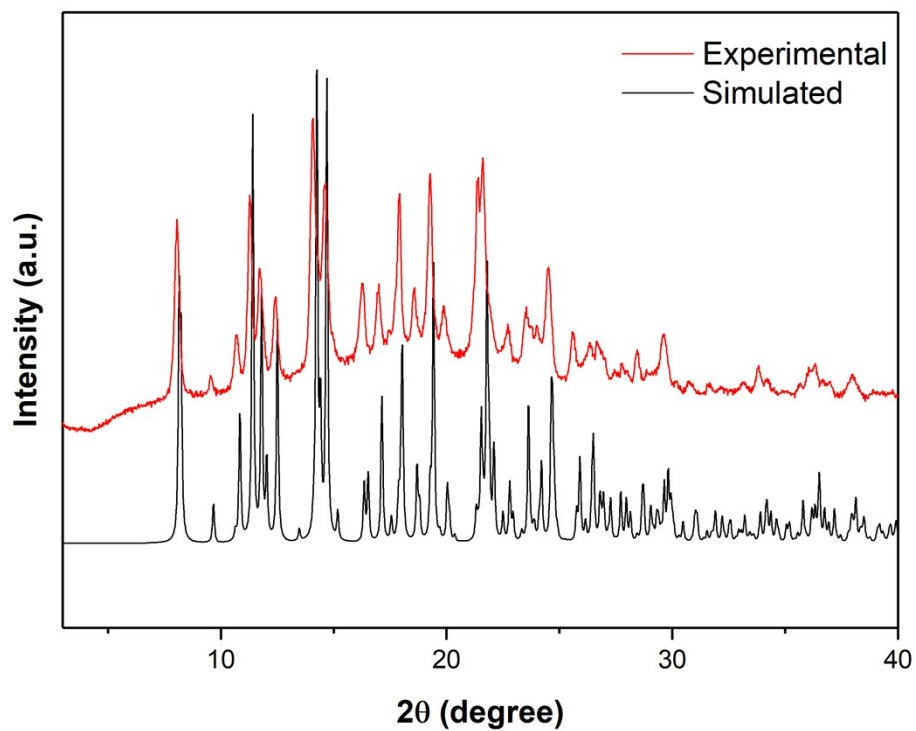

Figure S21. PXRD pattern comparison of the synthesized **1** bulk powder and the simulated pattern from the SCXRD data.

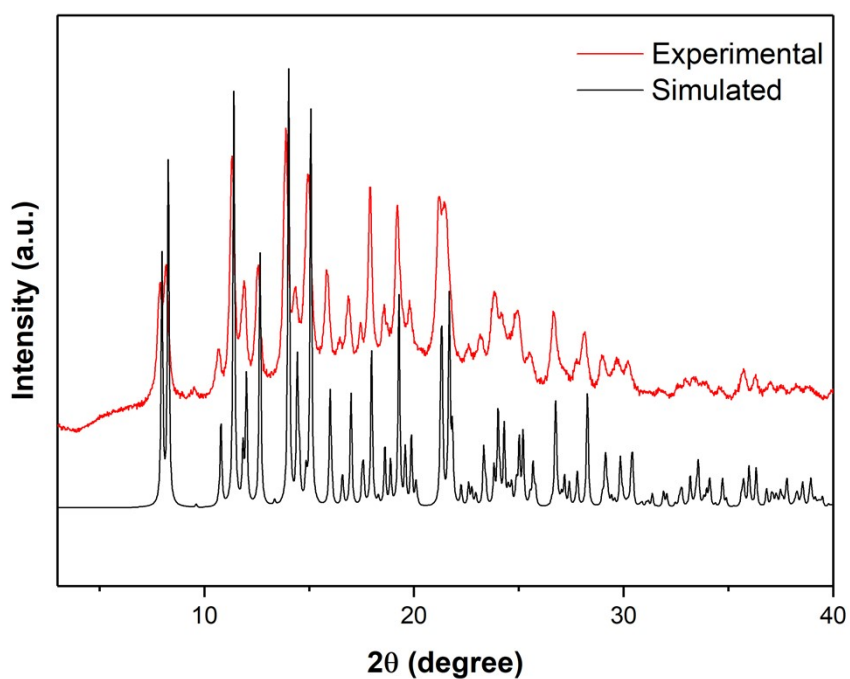

Figure S22. PXRD pattern comparison of the synthesized **2** bulk powder and the simulated pattern from the SCXRD data.

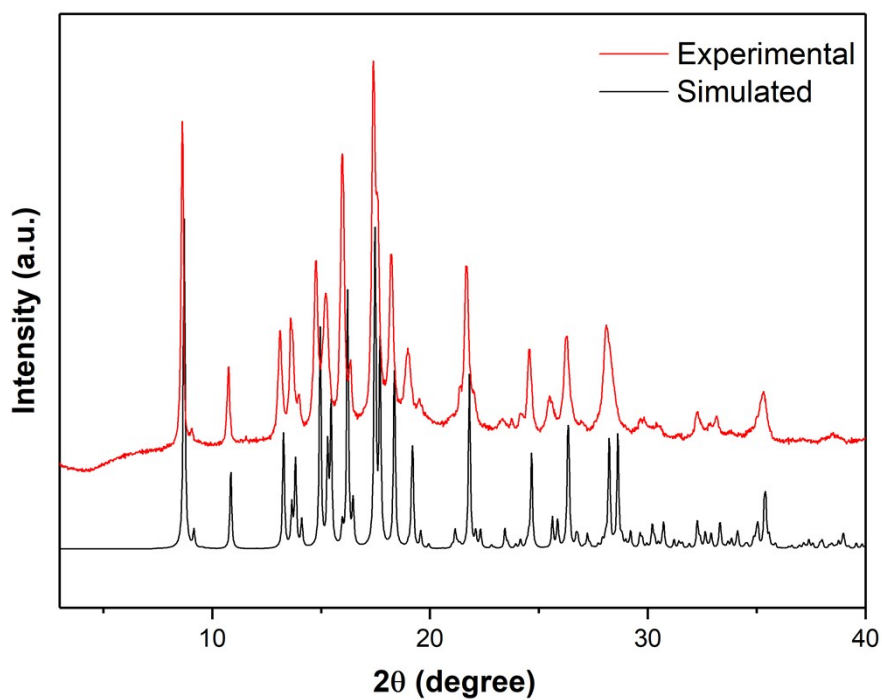

Figure S23. PXRD pattern comparison of the synthesized **3** bulk powder and the simulated pattern from the SCXRD data.

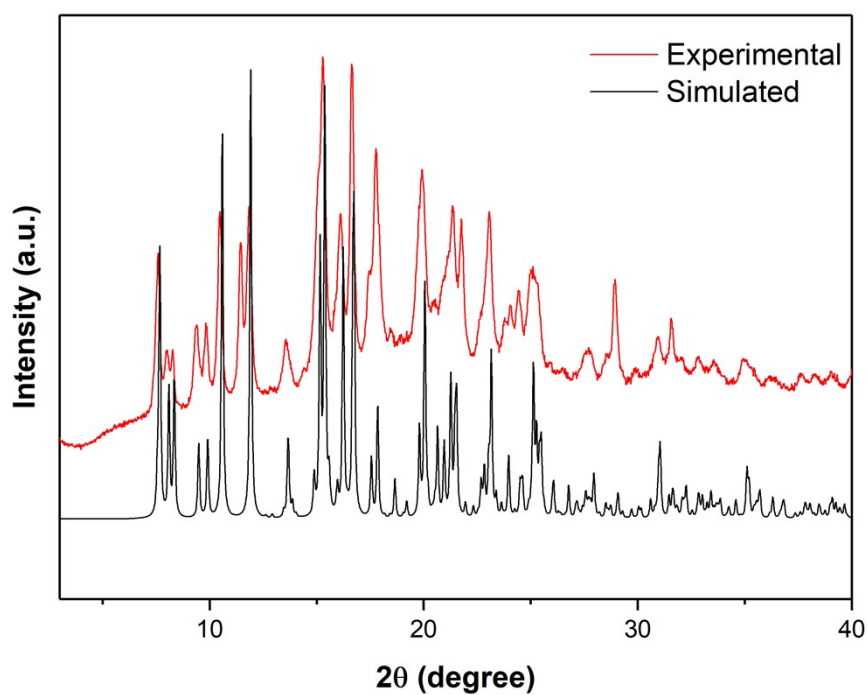

Figure S24. PXRD pattern comparison of the synthesized **4** bulk powder and the simulated pattern from the SCXRD data.



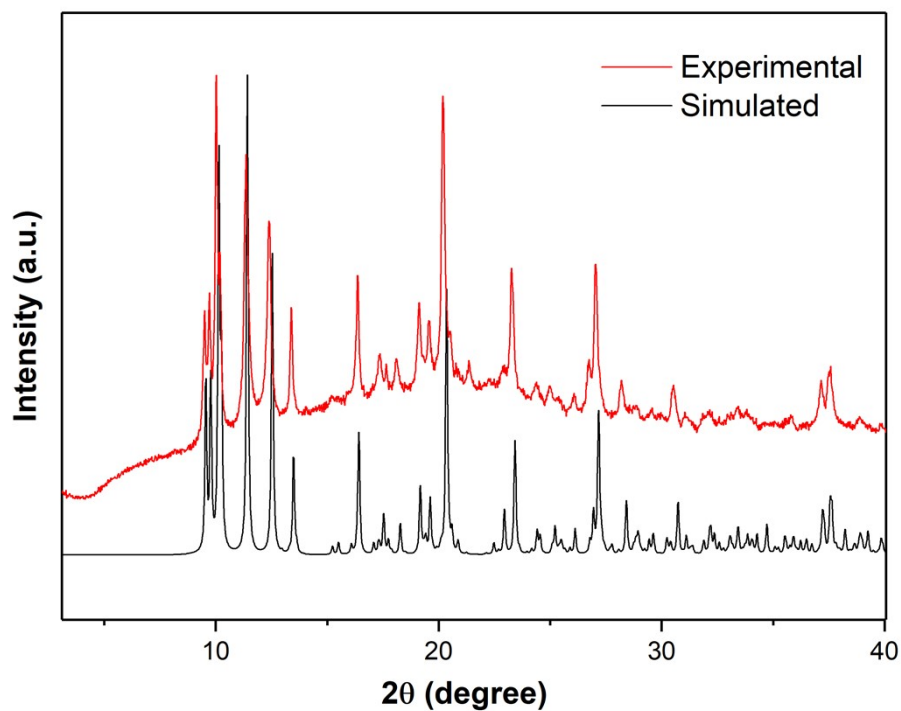

Figure S25. PXRD pattern comparison of the synthesized **5** bulk powder and the simulated pattern from the SCXRD data.

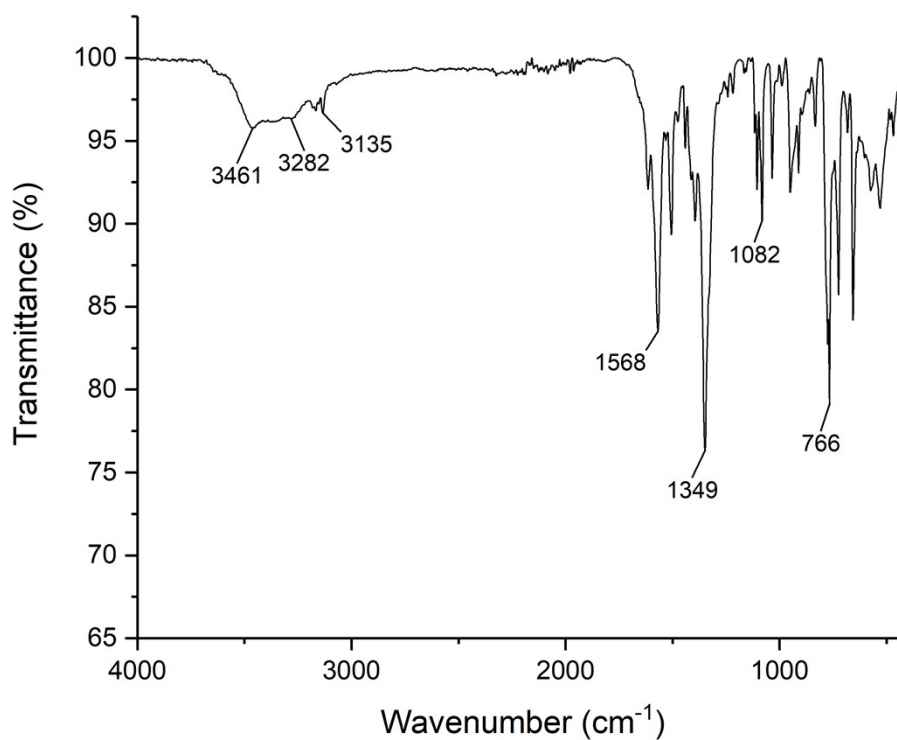

Figure S26. FT-IR spectrum of **1**.

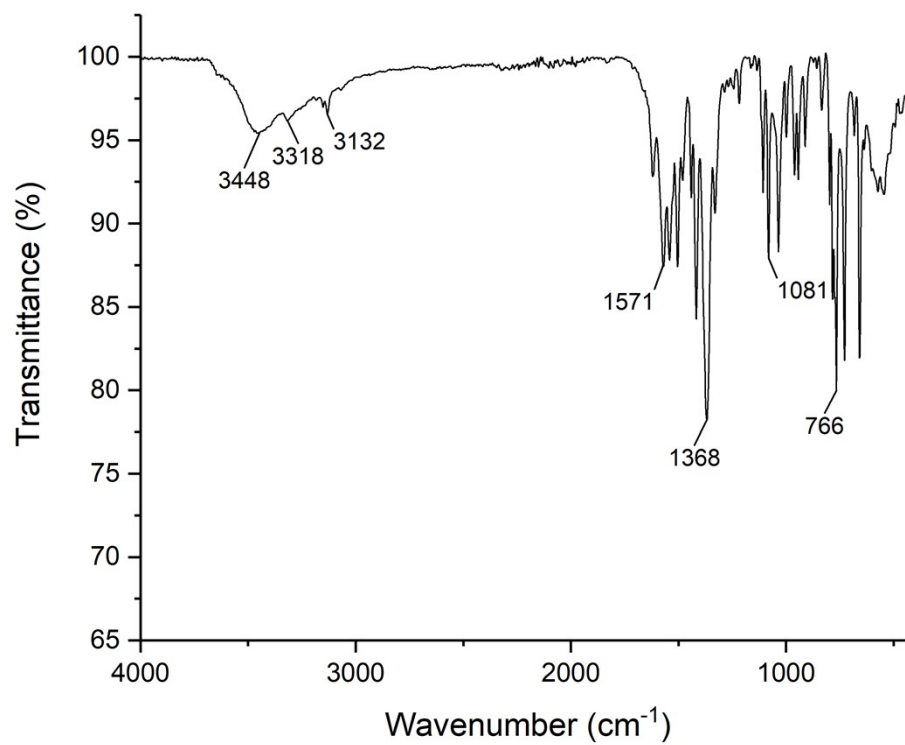

Figure S27. FT-IR spectrum of **2**.

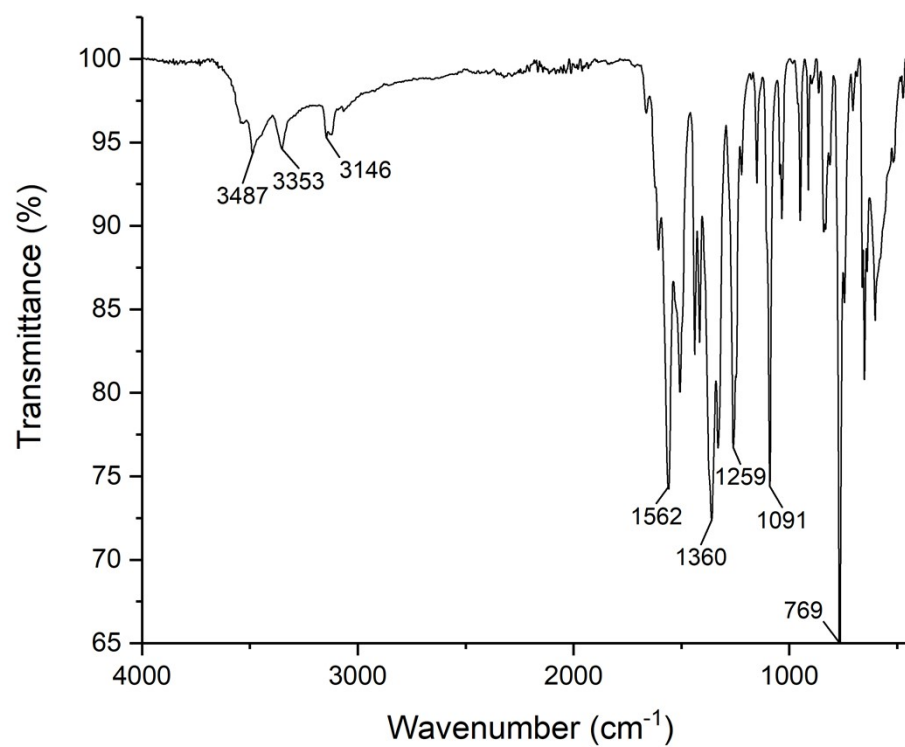

Figure S28. FT-IR spectrum of **3**.

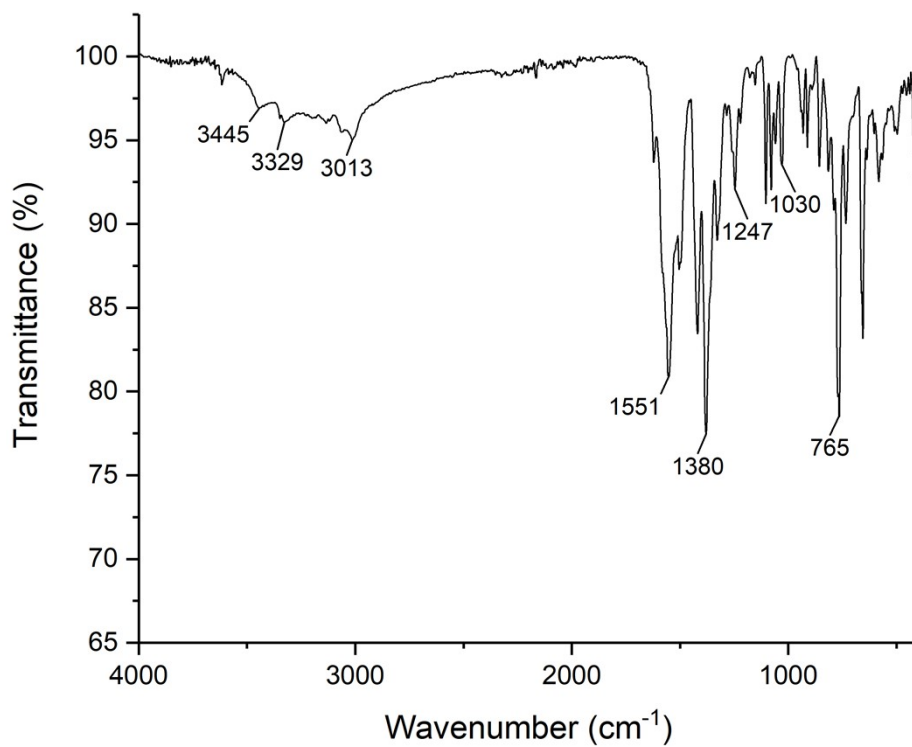

Figure S29. FT-IR spectrum of 4.

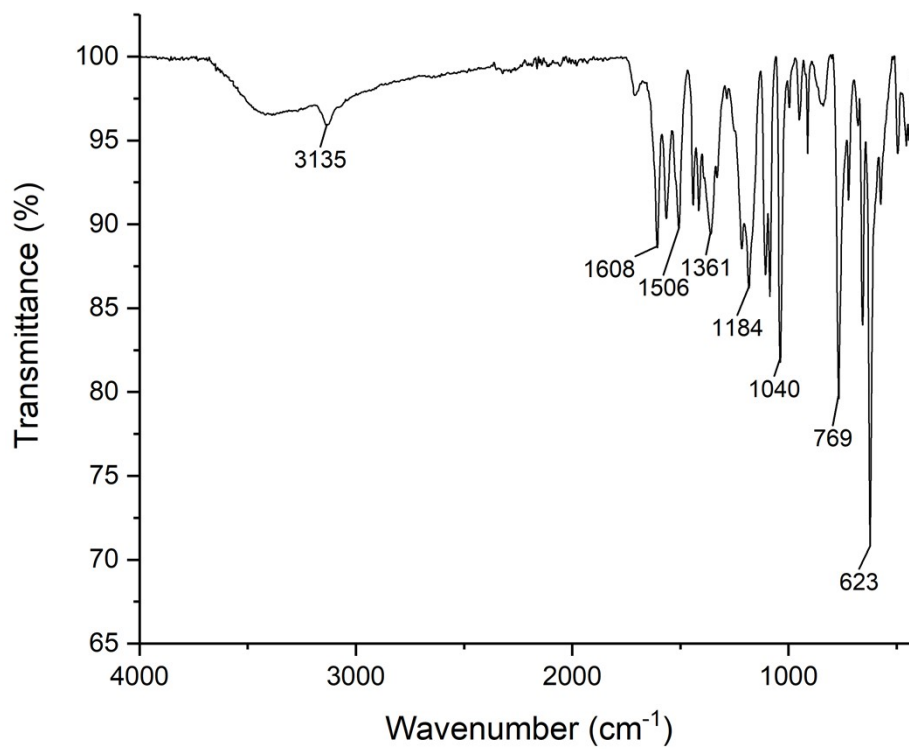

Figure S30. FT-IR spectrum of 5.

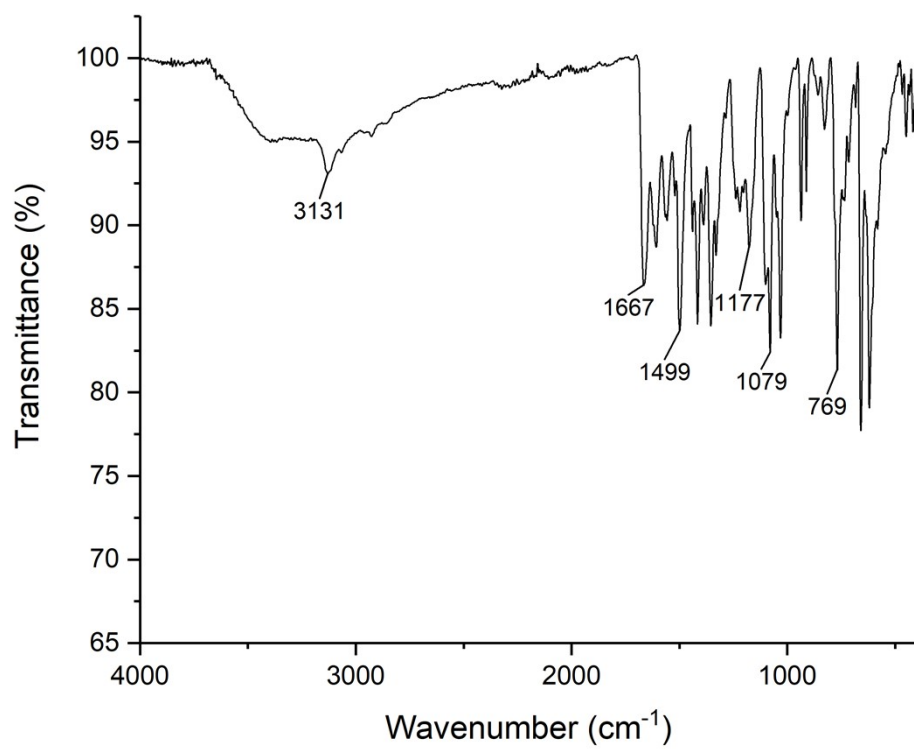

Figure S31. FT-IR spectrum of **6**.

## Tauc-plots and optical band gap estimates of the synthesized compounds

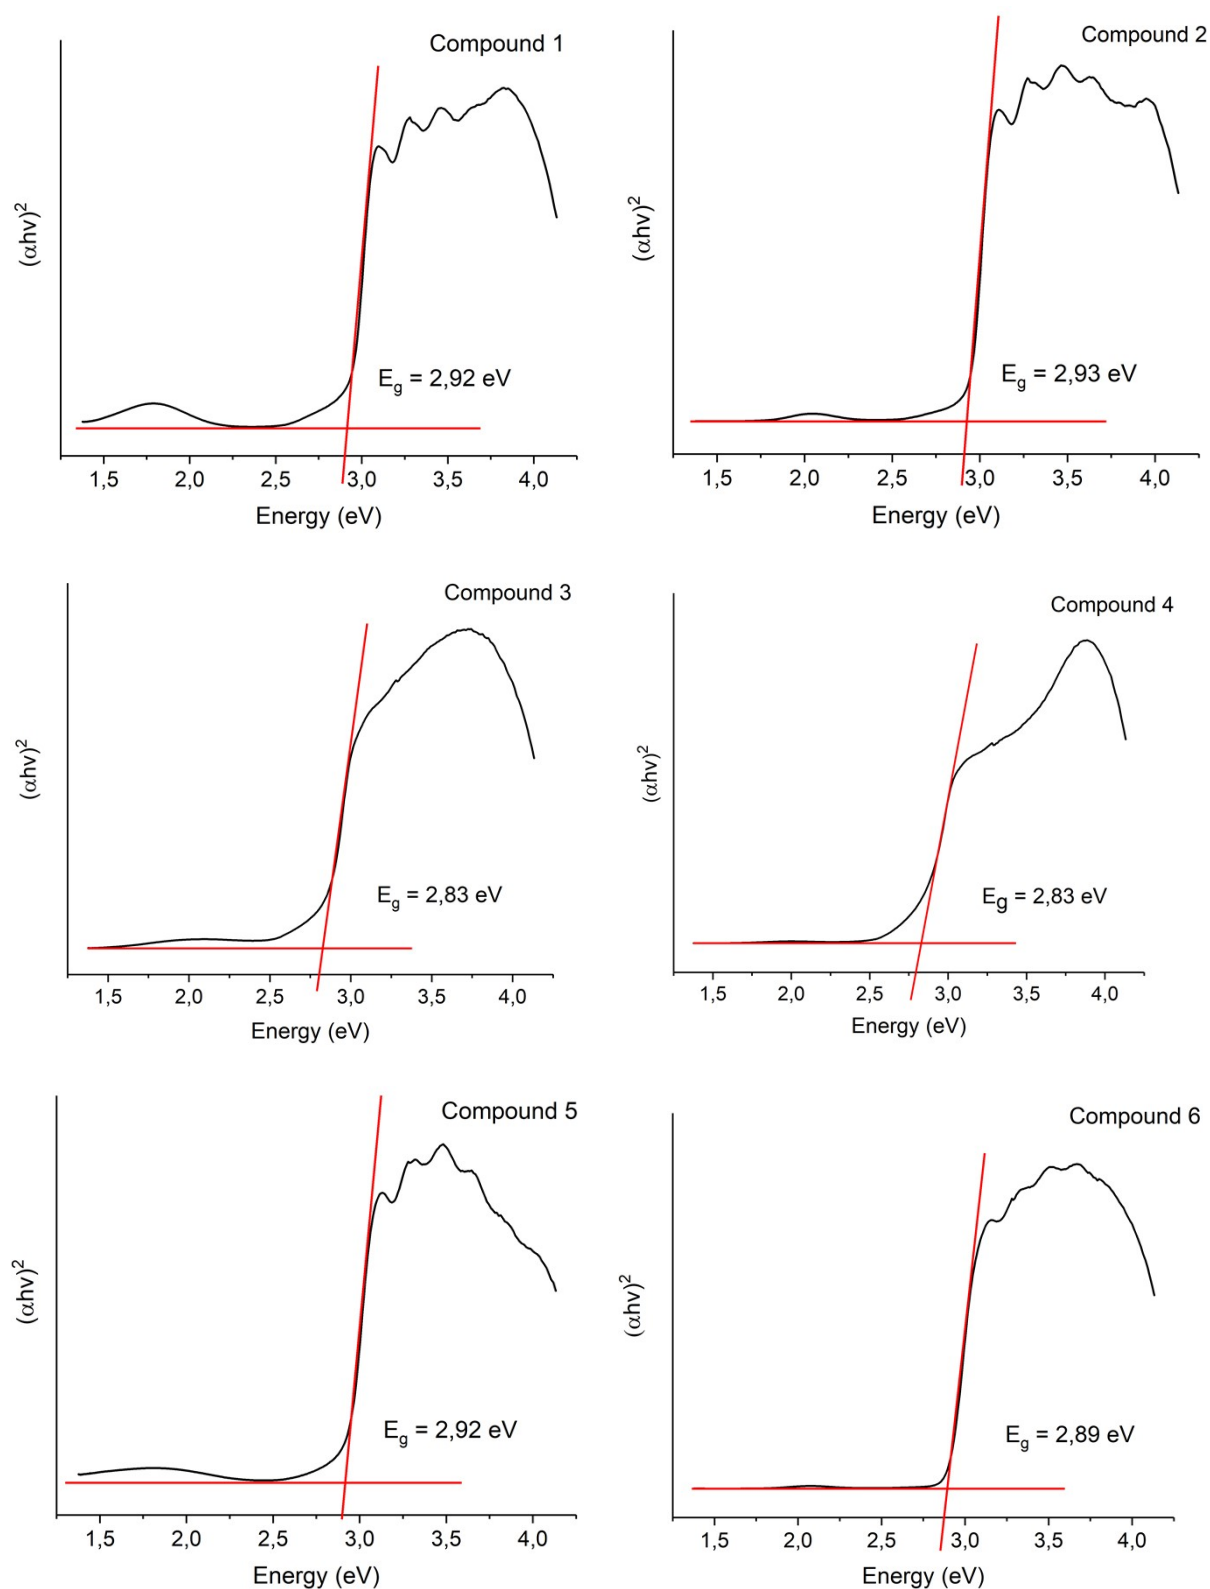

Figure S32. Tauc-plots of compounds **1-6** and their estimated optical band gap values.  $\alpha$  = absorption coefficient,  $h$  = Planck constant,  $\nu$  = light frequency and  $E_g$  = optical band gap.
